# Supplementary material for: Investigation of high-performance adsorption for benzene and toluene vapors by calix[4]arene based organosilica (CBOS)
Source: Royal Society of Chemistry journal article supplement (doi:10.1039/d0nj02081h), 2020-01-01
Supplement: d0nj02081h1.pdf [file d0nj02081h1.pdf]

## Investigation of High-Performance Adsorption for Benzene and Toluene Vapors by Calix[4]arene based Organosilica (CBOS)

Farabi Temel<sup>1,\*</sup>, Sinan Kutluay<sup>2</sup>

<sup>1</sup>Konya Technical University, Department of Chemical Engineering, 42130, Konya, Turkey

<sup>2</sup>Siirt University, Department of Chemical Engineering, 56100, Siirt, Turkey

\*Corresponding author. Tel.: +90 332 2251938; fax: +90 332 2410635.

E-mail address: ftemel@ktun.edu.tr (F. TEMEL).

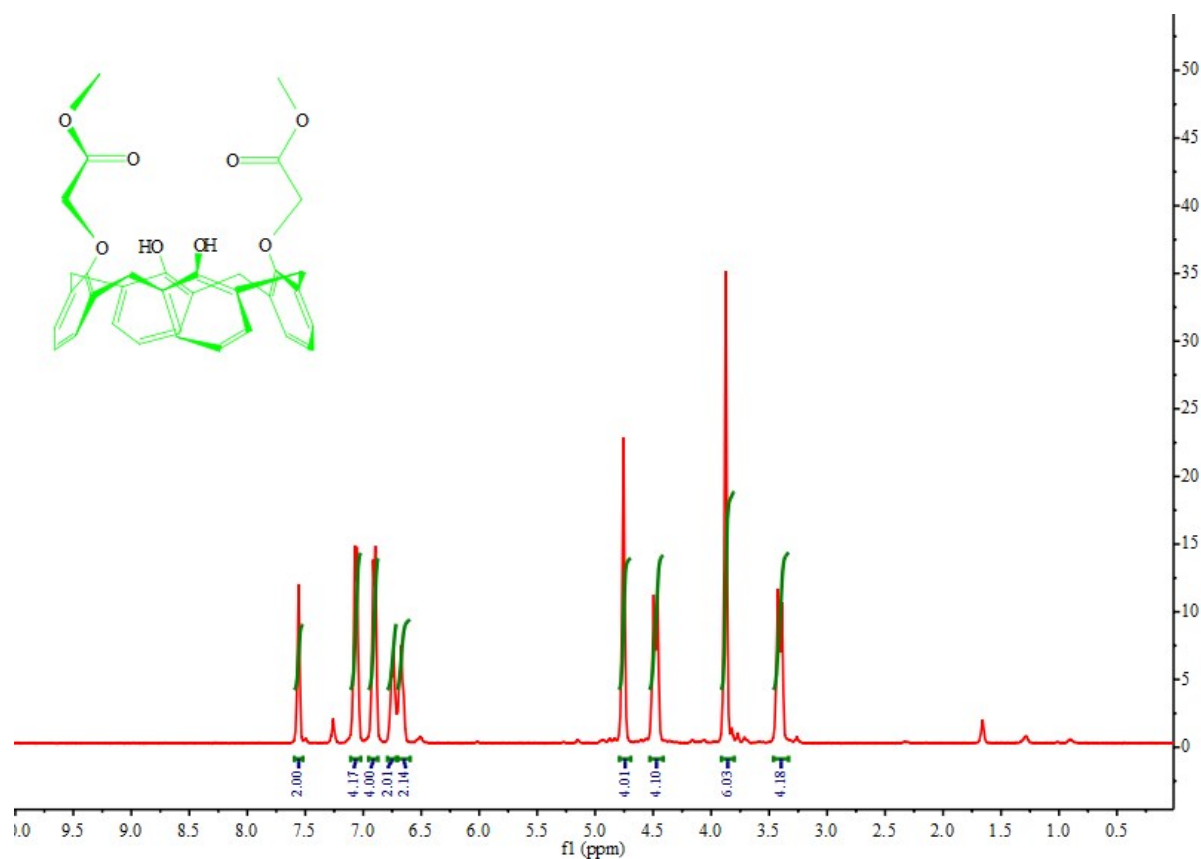

**Fig. S1.** The <sup>1</sup>H NMR spectra of calix-3.

<sup>1</sup>H-NMR (400 MHz, CDCl<sub>3</sub>): δ (ppm) 7.59 (s, 2H, OH), 7.11 (s, 4H, ArH), 6.95 (s, 4H, ArH), 6.79 (s, 2H, ArH), 6.70 (s, 2H, ArH), 4.79 (s, 4H, OCH<sub>2</sub>), 4.53 (d, 4H, ArCH<sub>2</sub>Ar), 3.91 (s, 6H, OCH<sub>3</sub>), 3.46 (d, 4H, ArCH<sub>2</sub>Ar). Anal. Calcd for C<sub>34</sub>H<sub>32</sub>O<sub>8</sub>: C, 71.82; H, 5.67; O, 22.51; Found: 72.91; H, 5.08; O, 22.01.

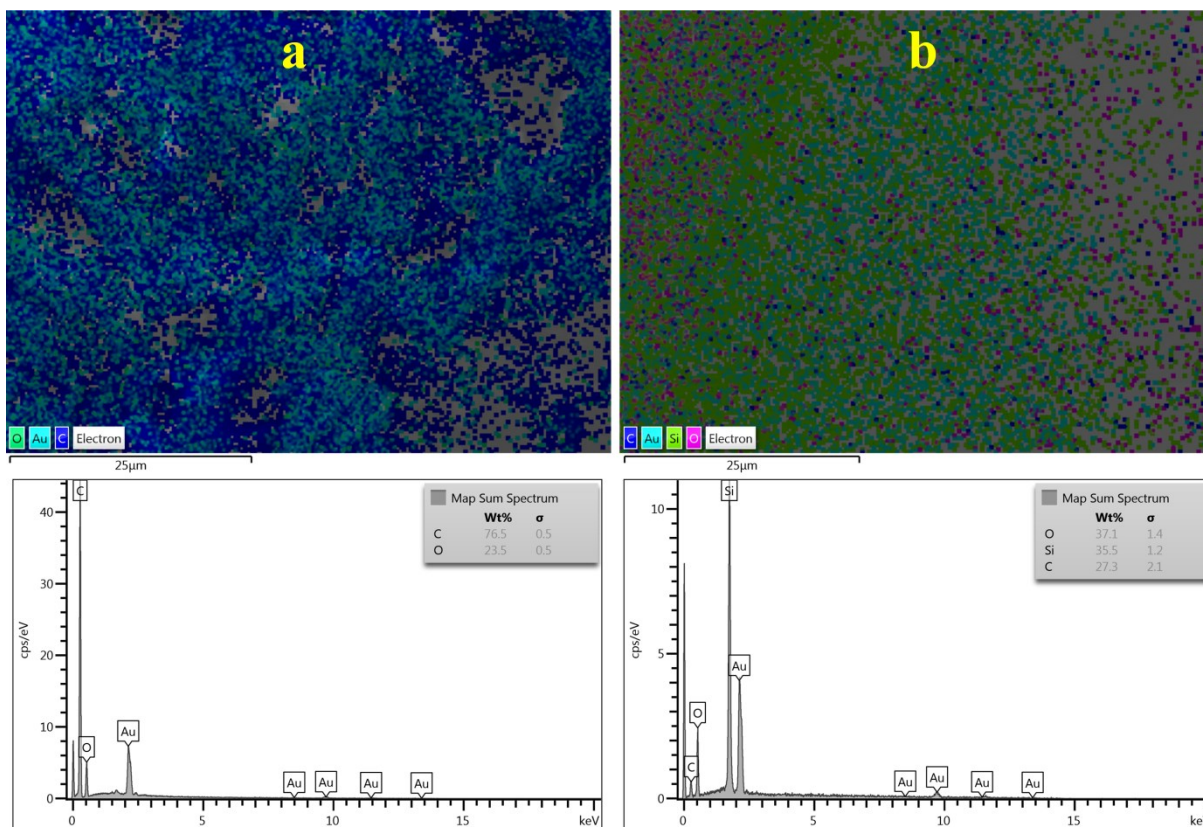

**Fig. S2.** EDS mapping of the calix-3 (a) and CBOS (b).

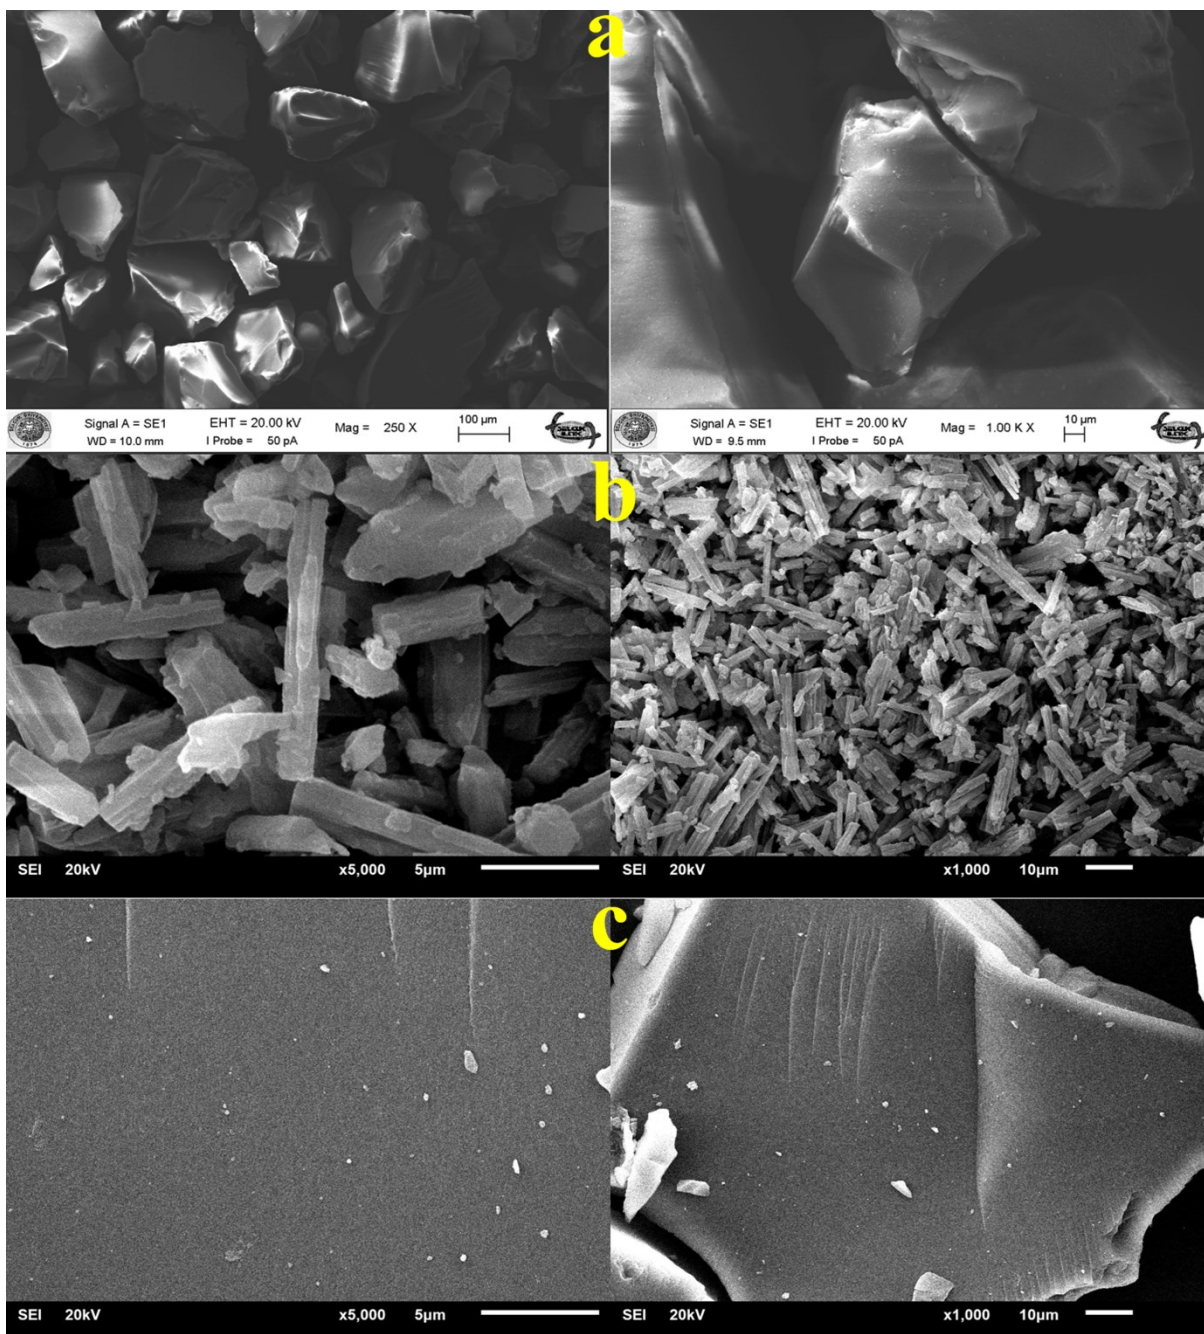

**Fig. S3.** SEM images of mesoporous silica (a), calix-3 (b), CBOS (c).

Isotherm : Linear

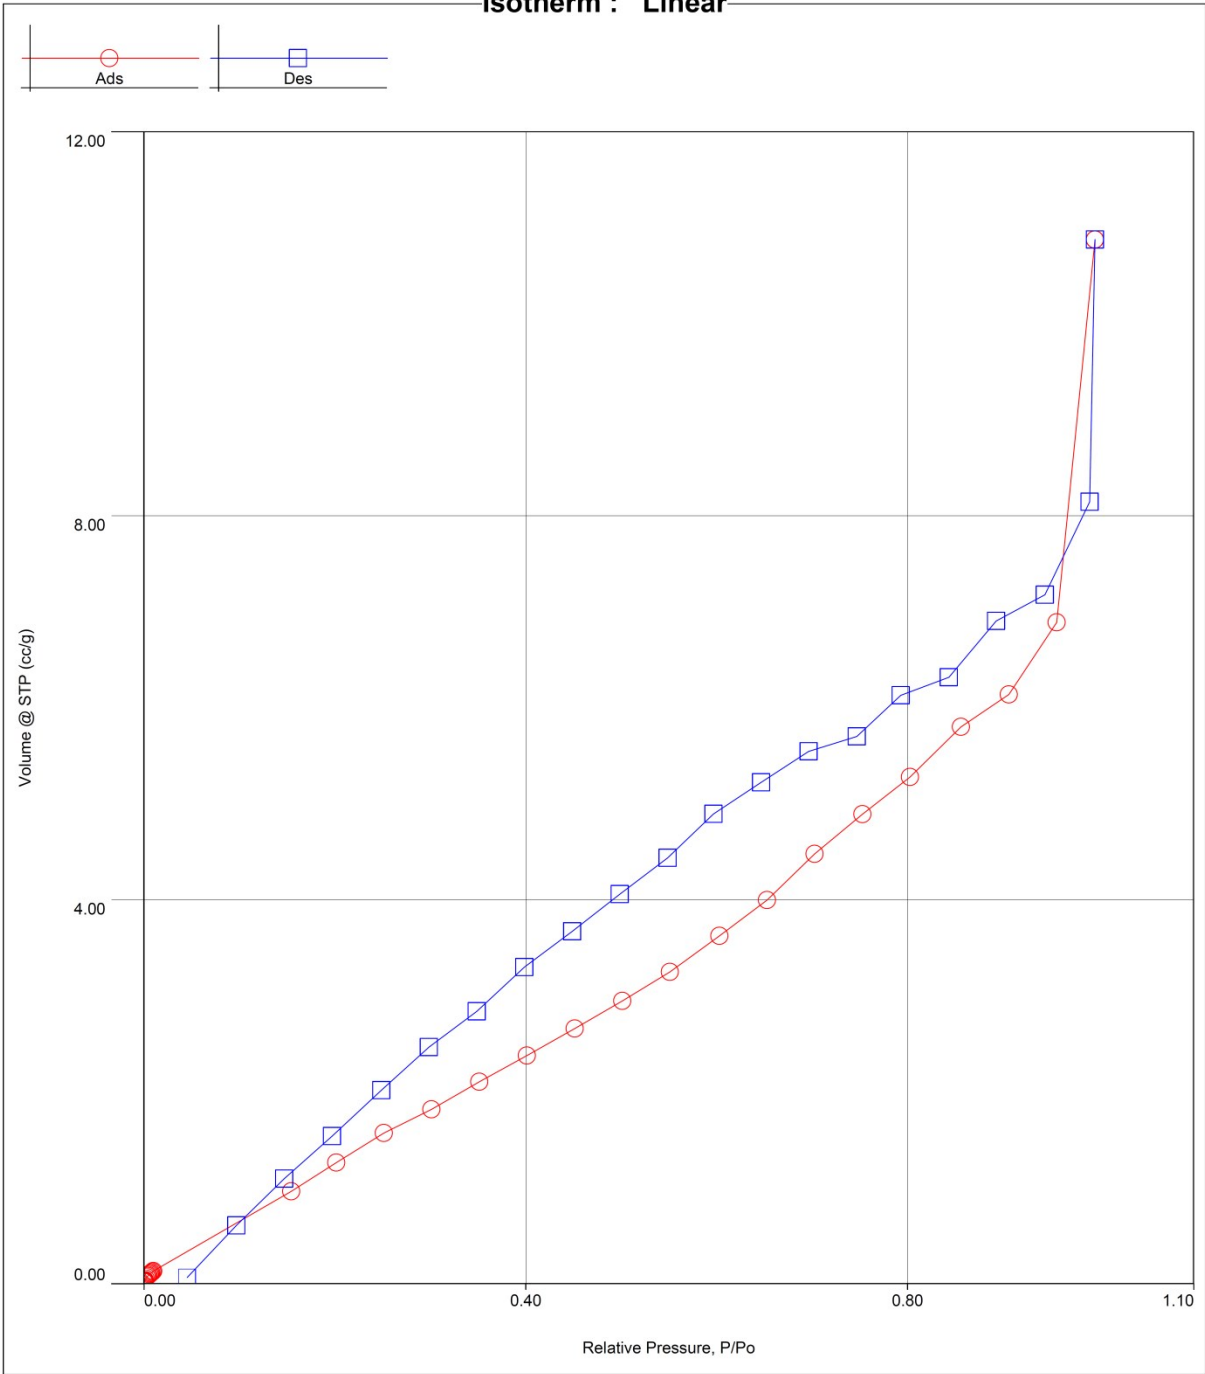

### Isotherm : Log Scale

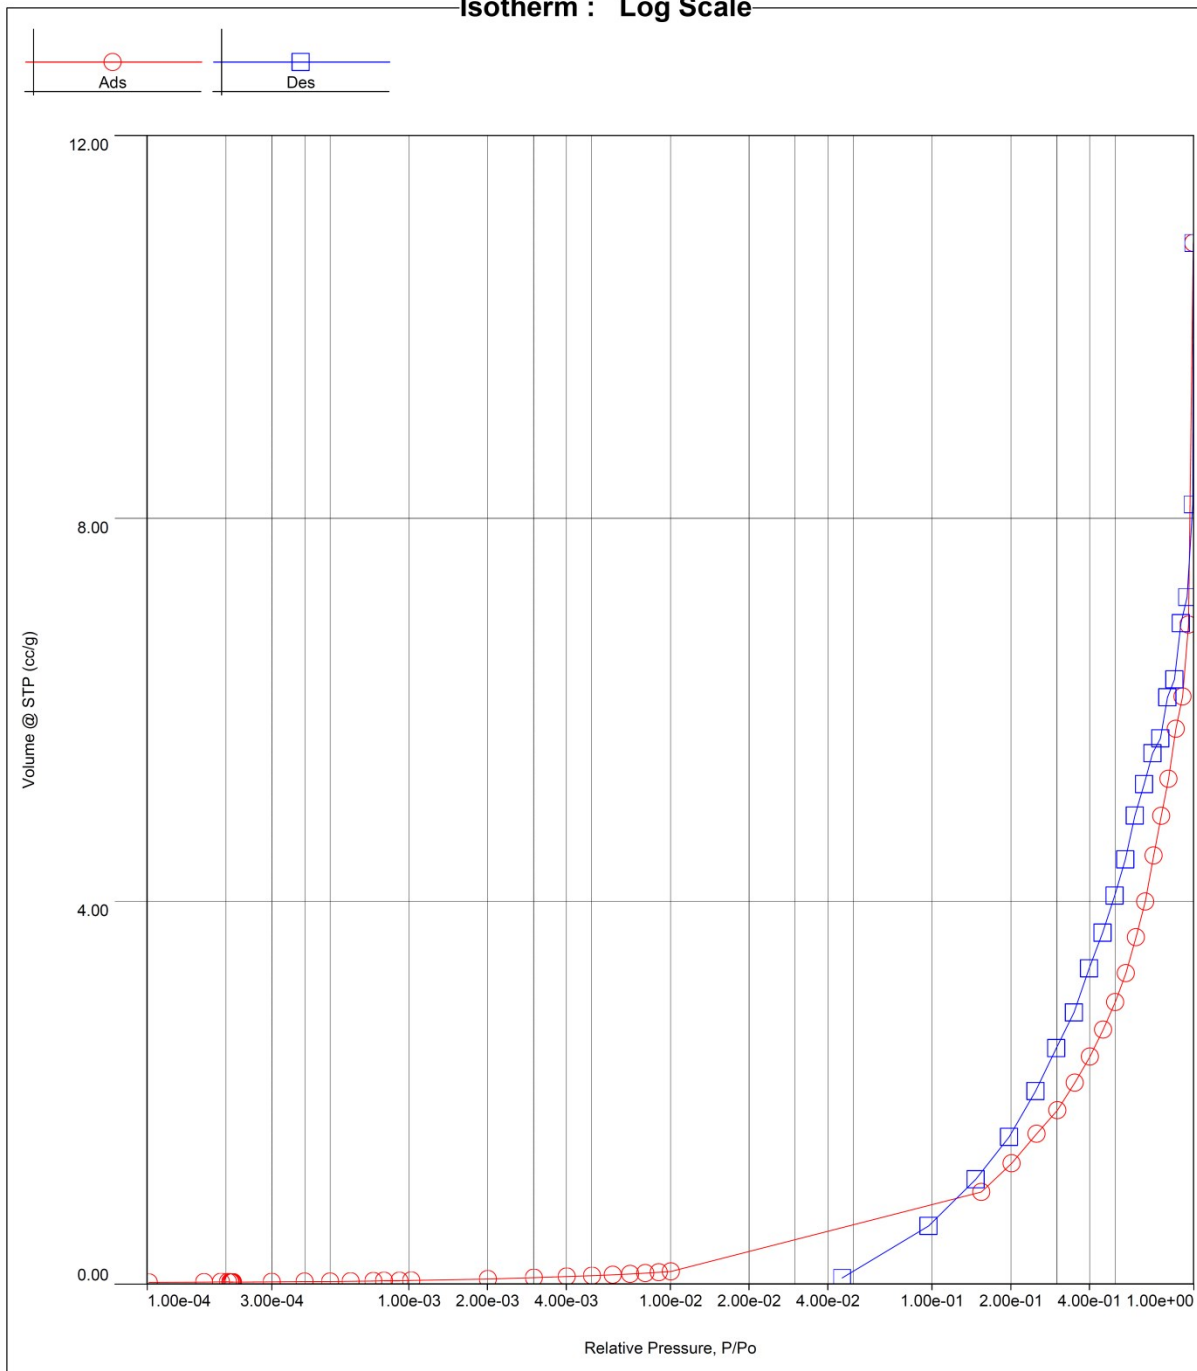

# Multi-Point BET Plot

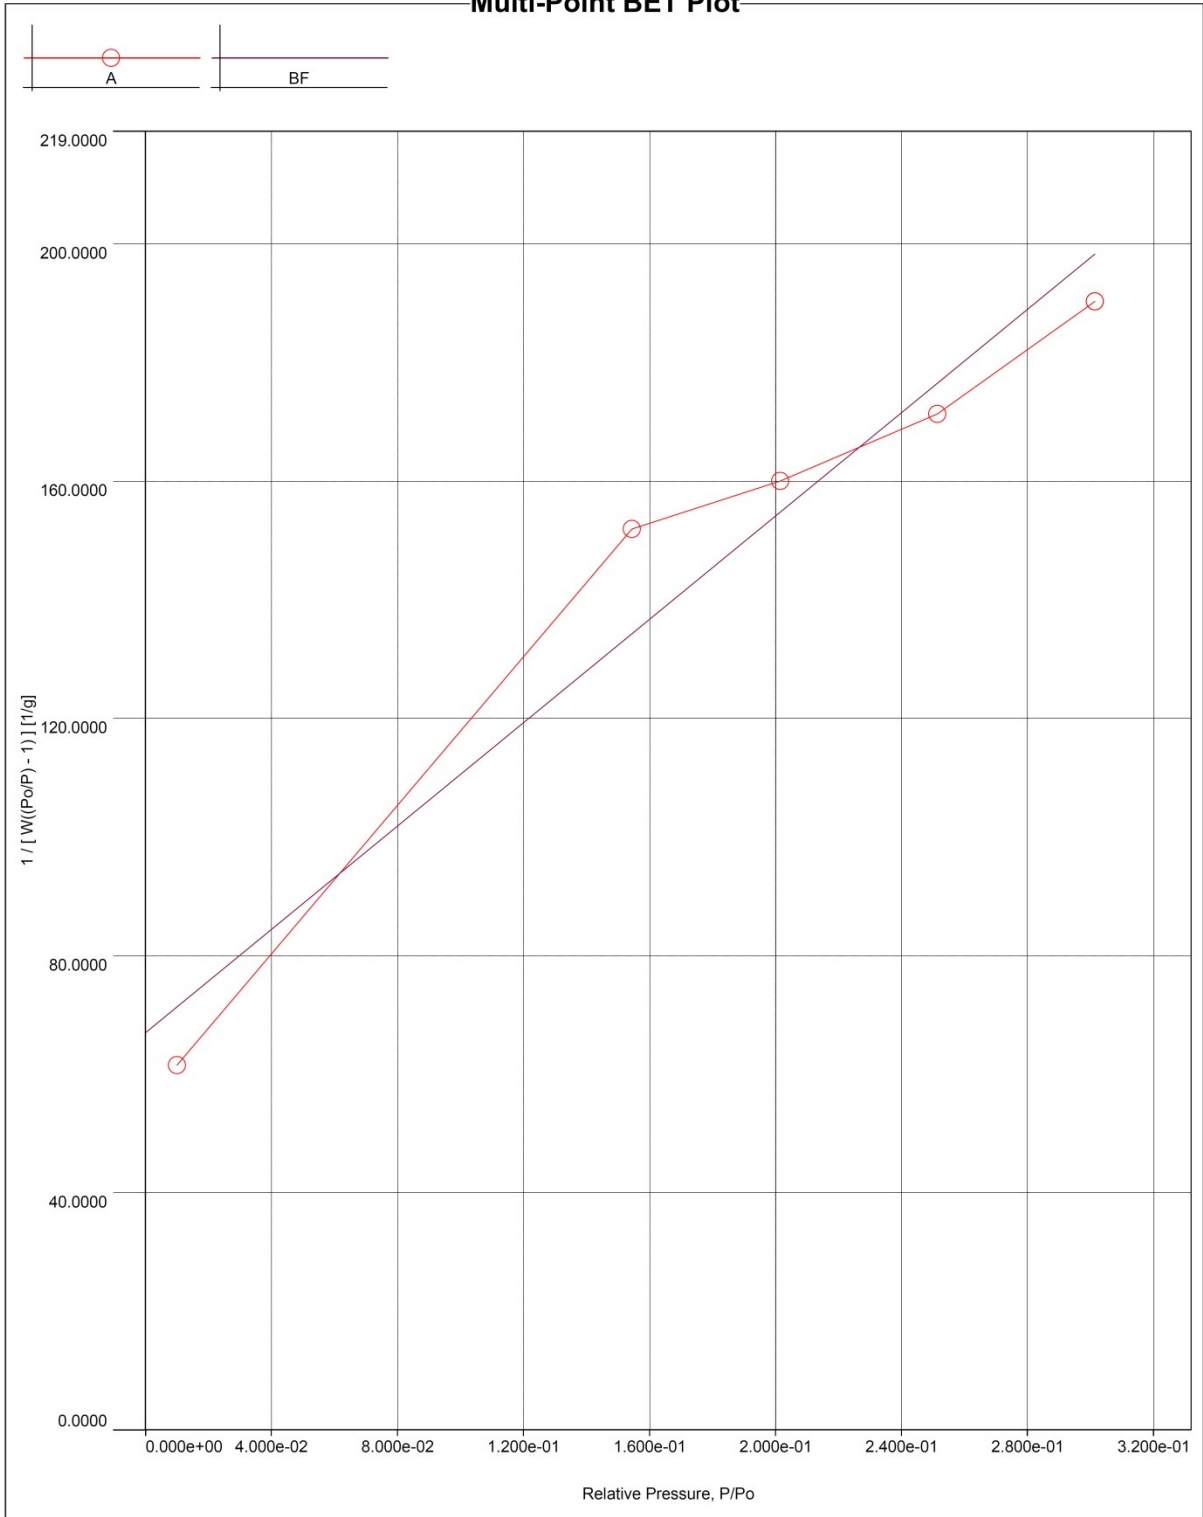

# t plot

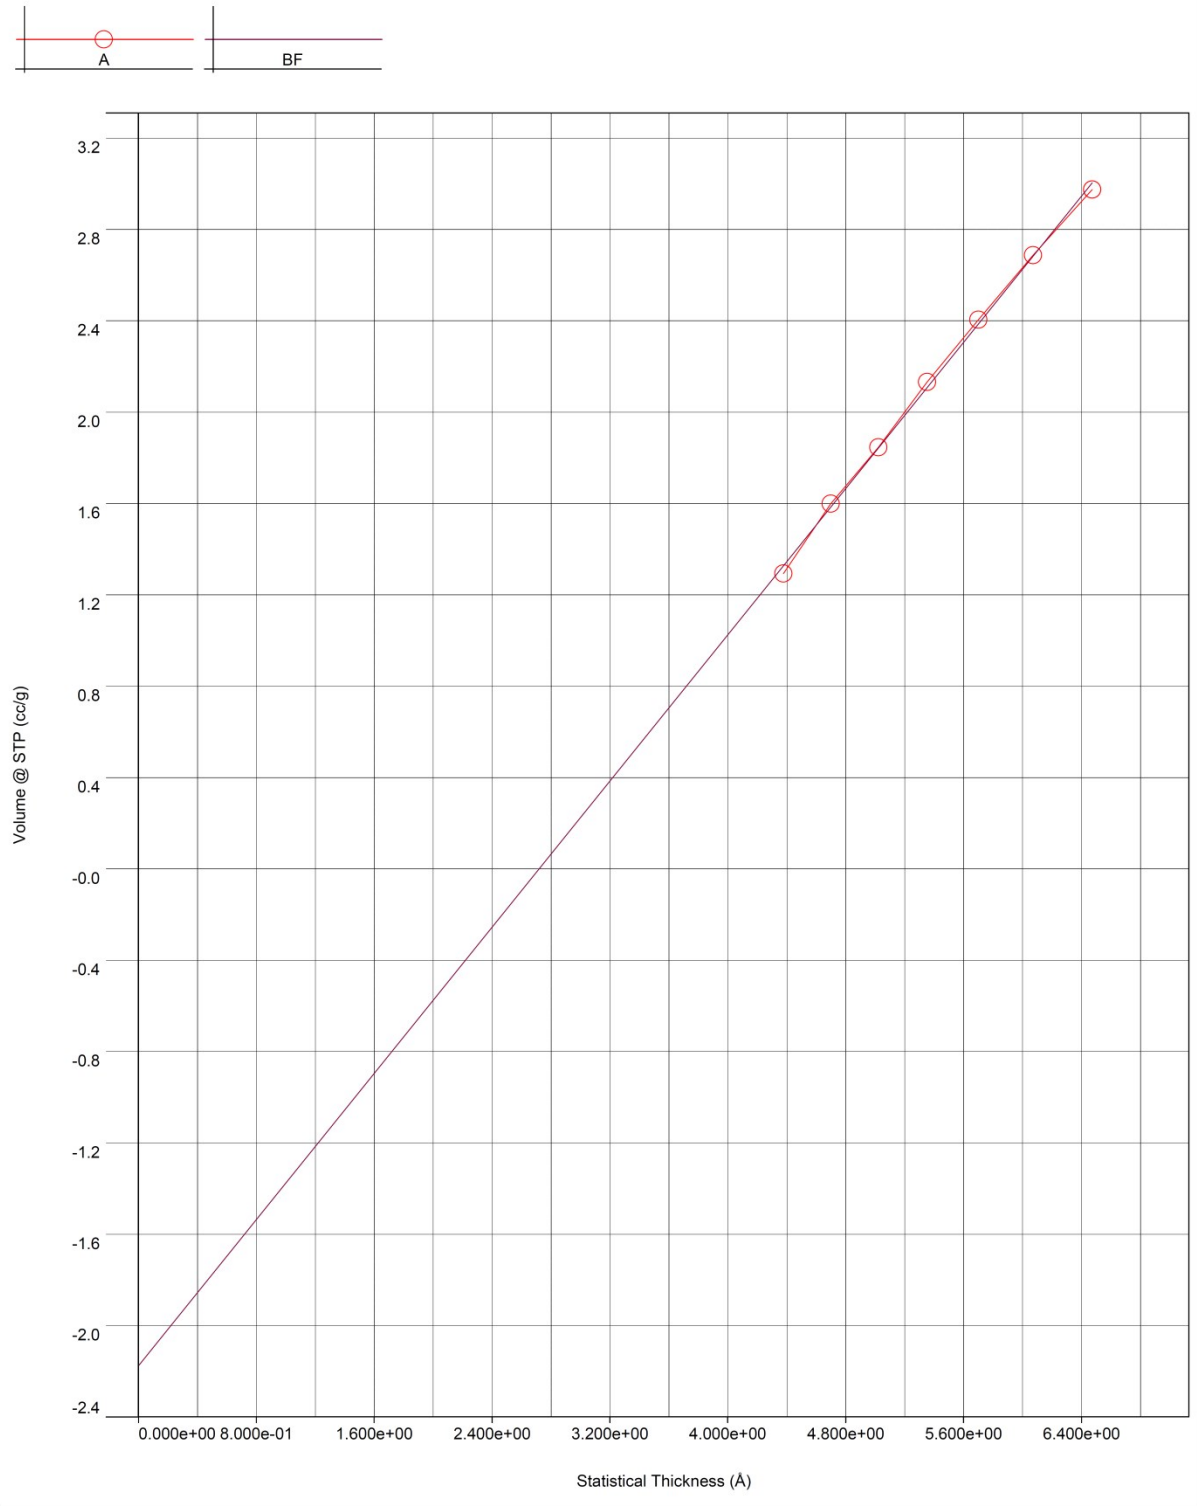



### BJH method Adsorption dV()

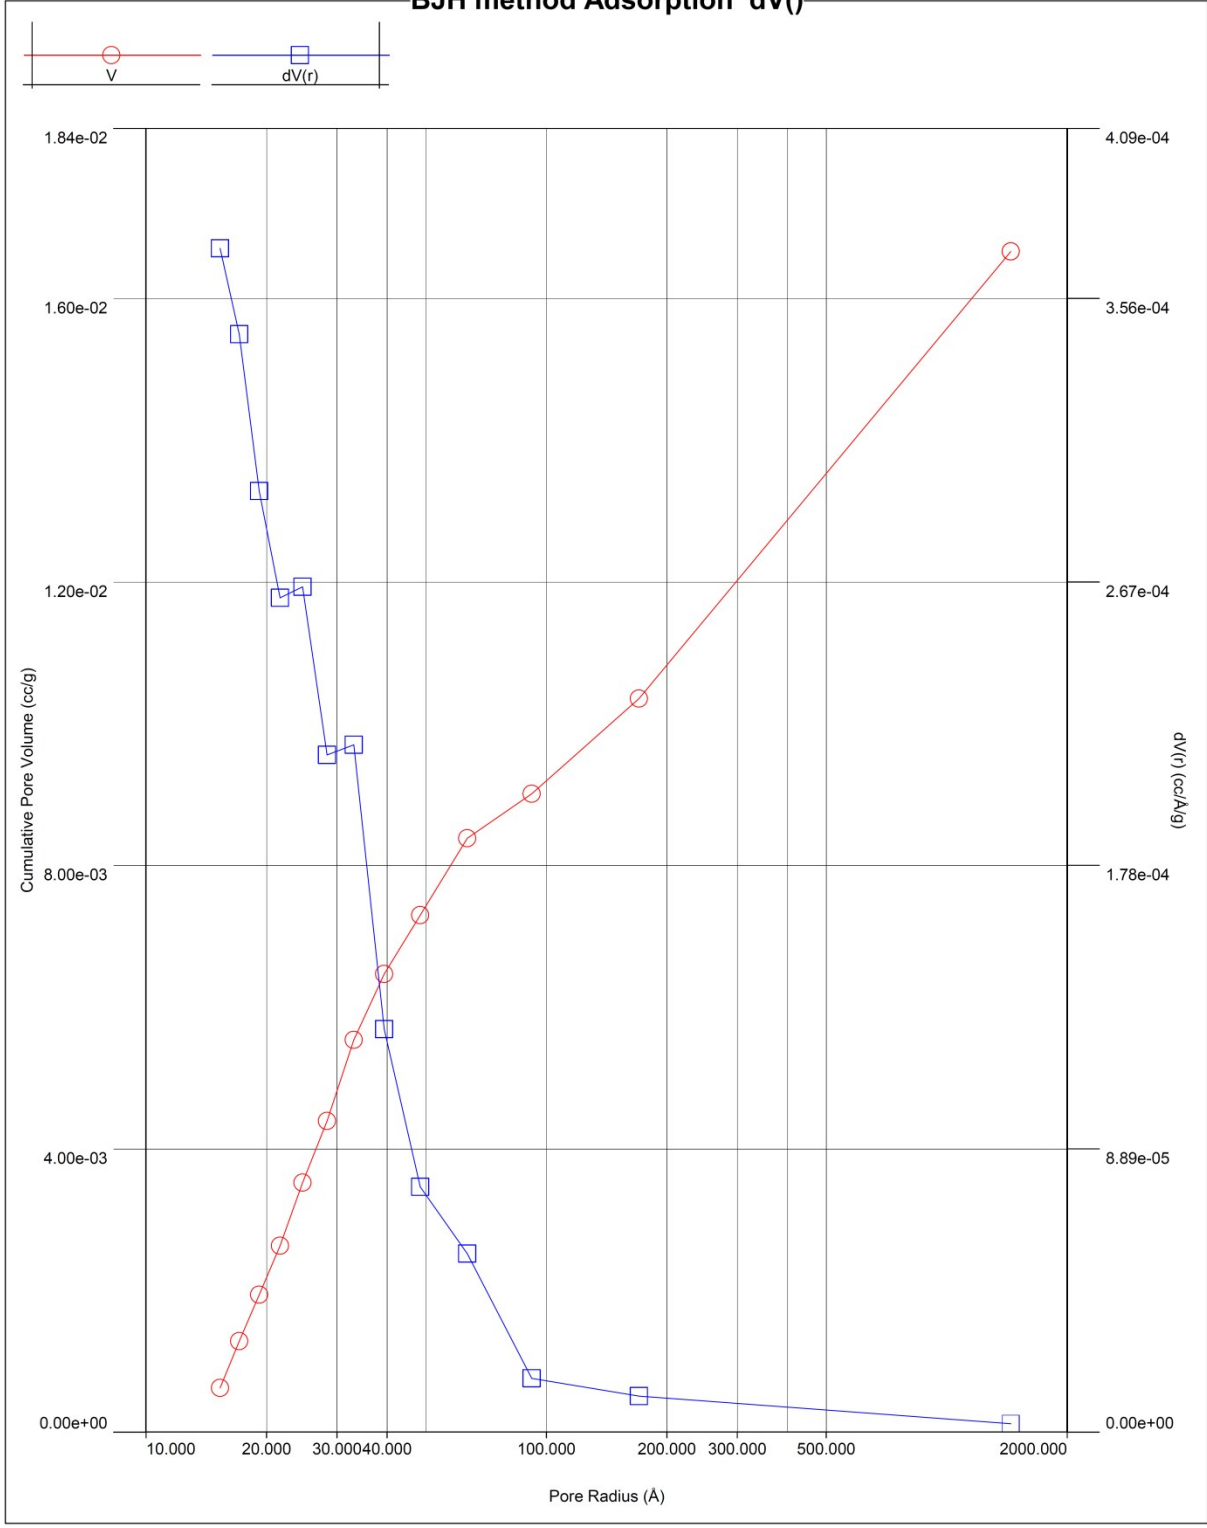



### BJH method Adsorption $dV(\log)$

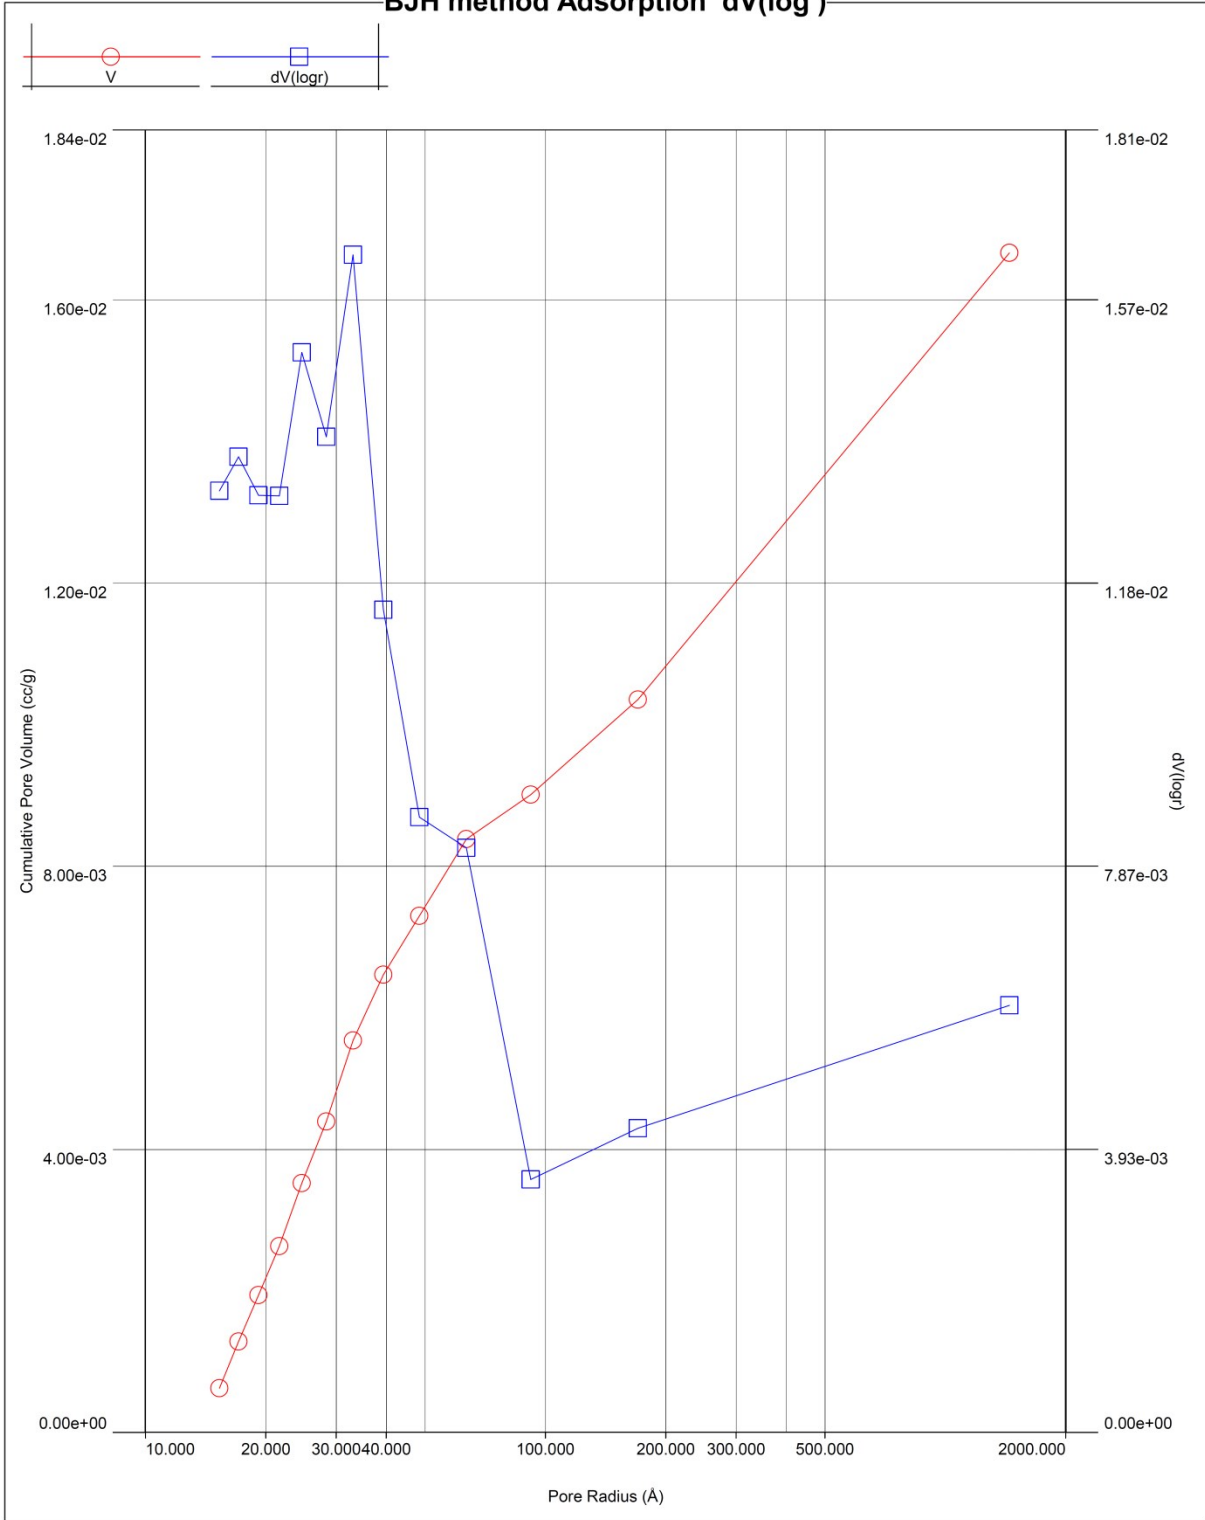

### BJH method Desorption dV()

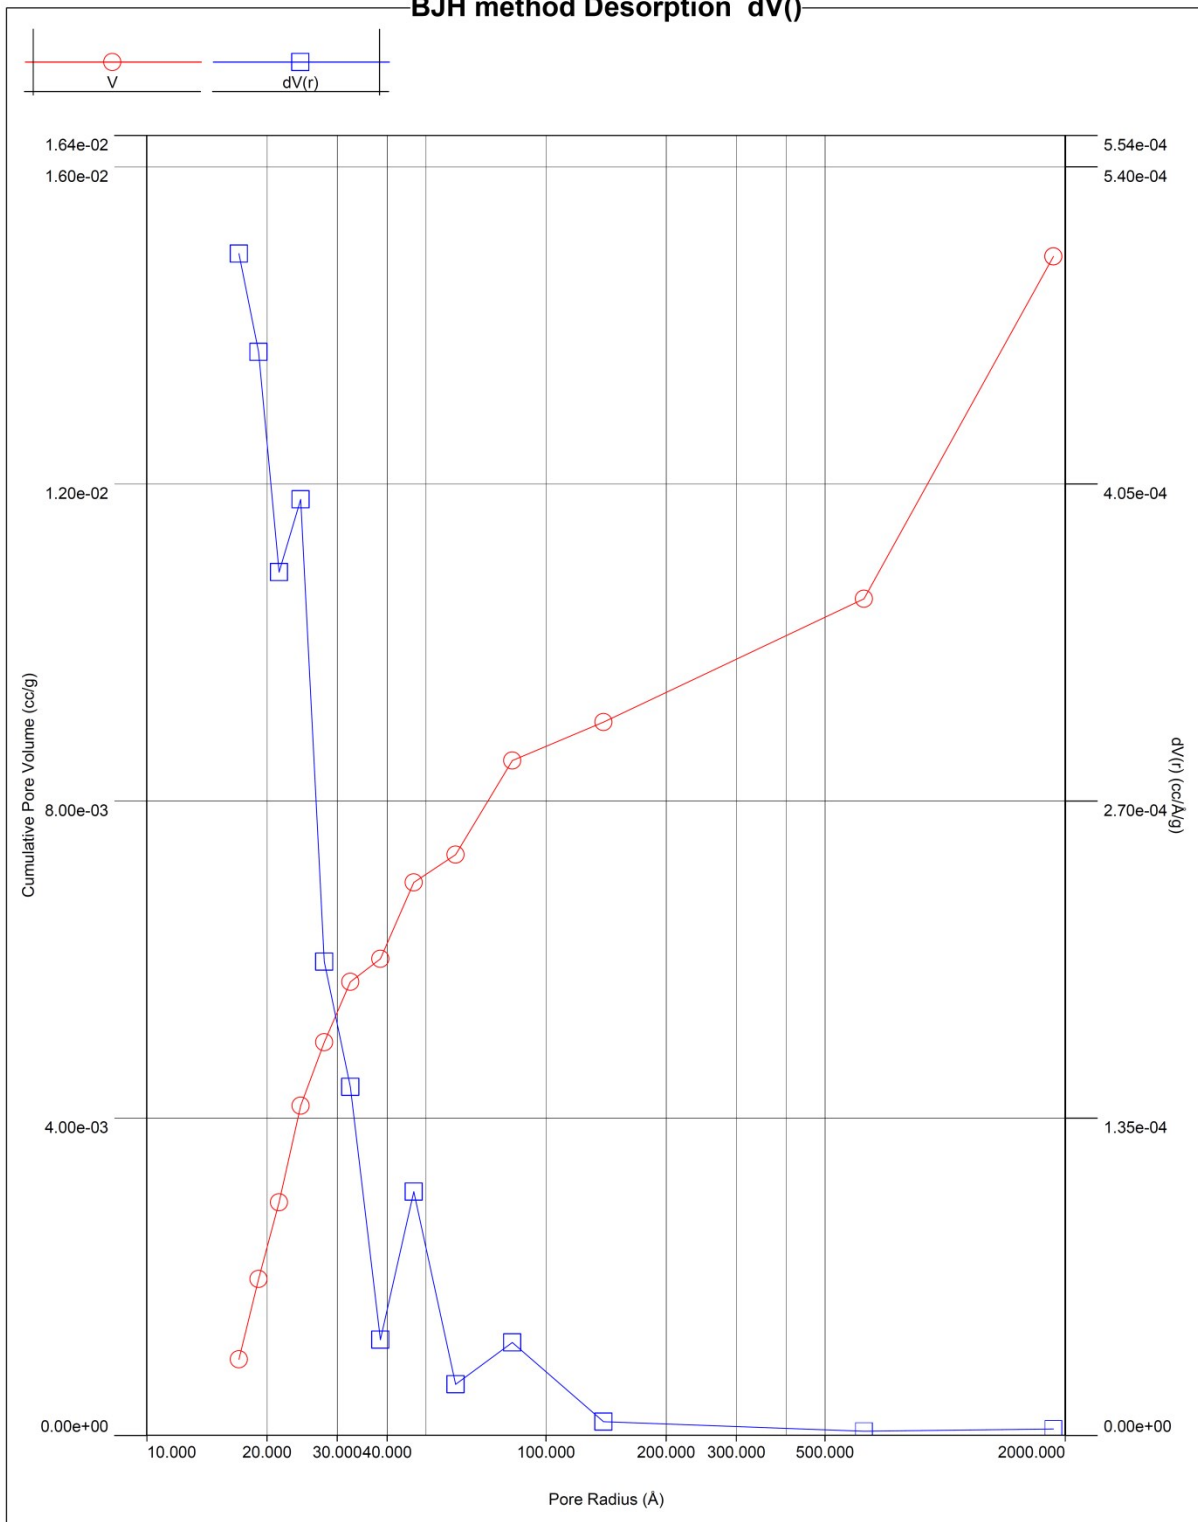

### BJH method Desorption $dV(\log)$

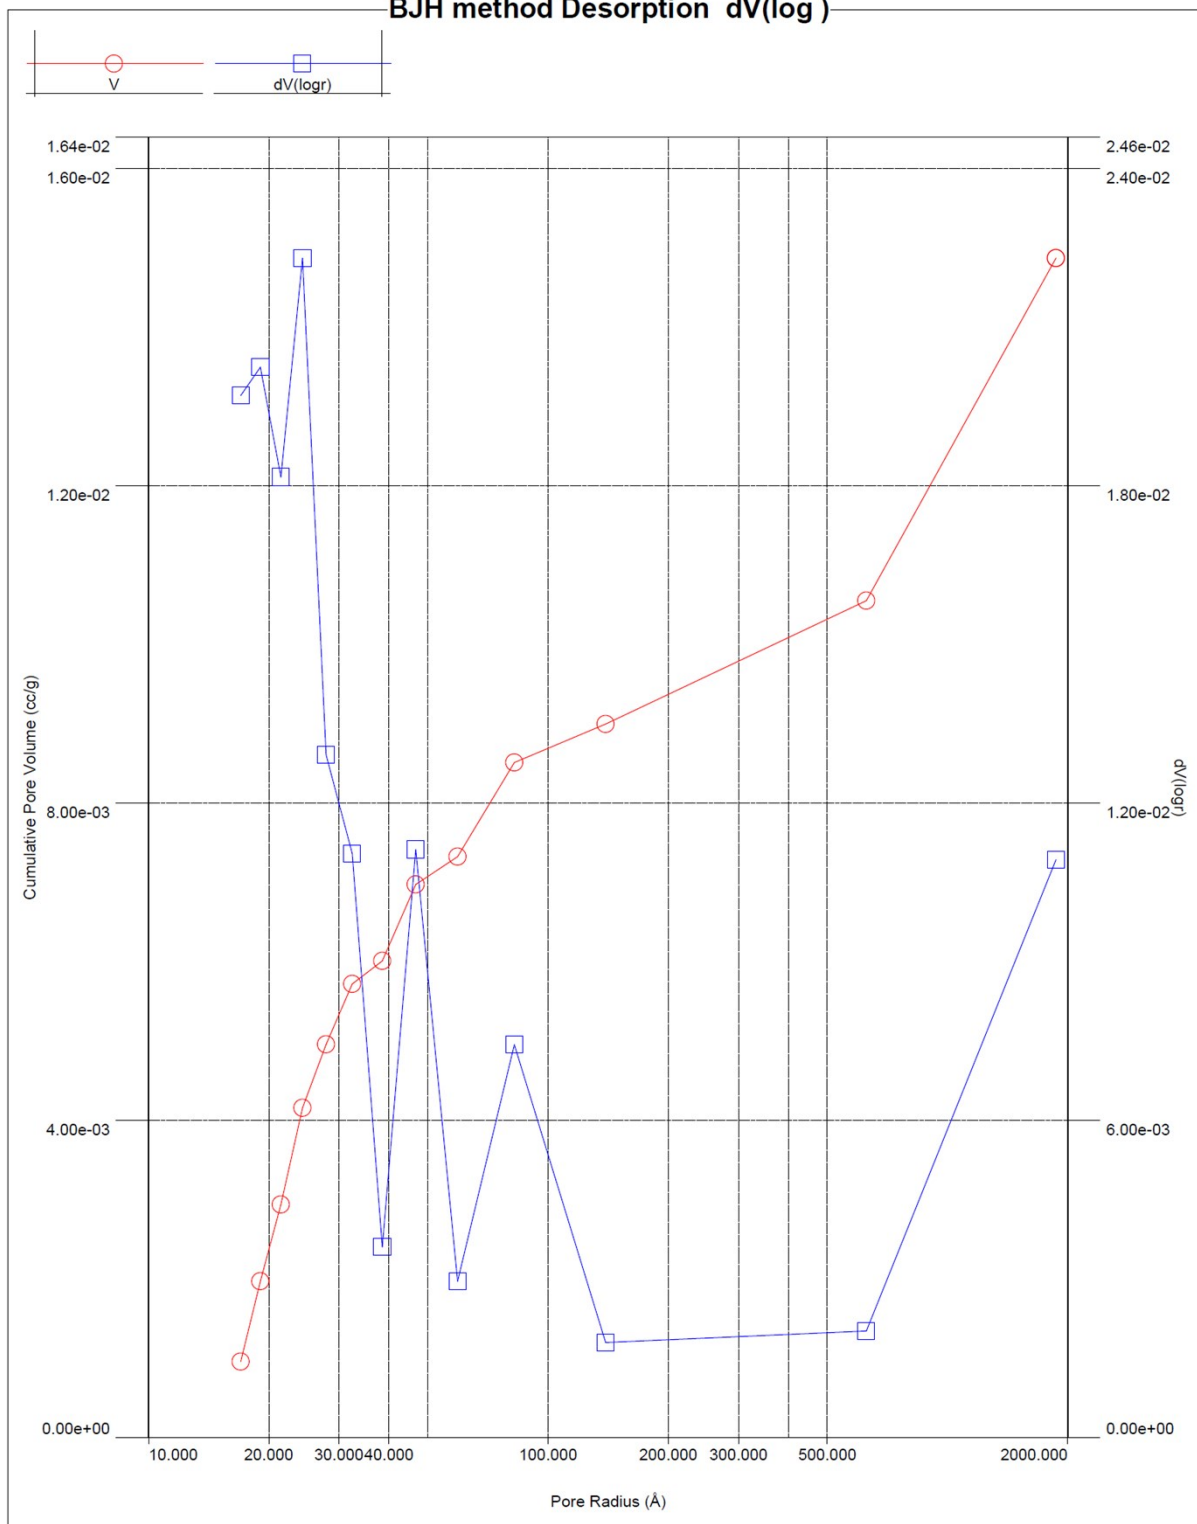

DFT : dV()

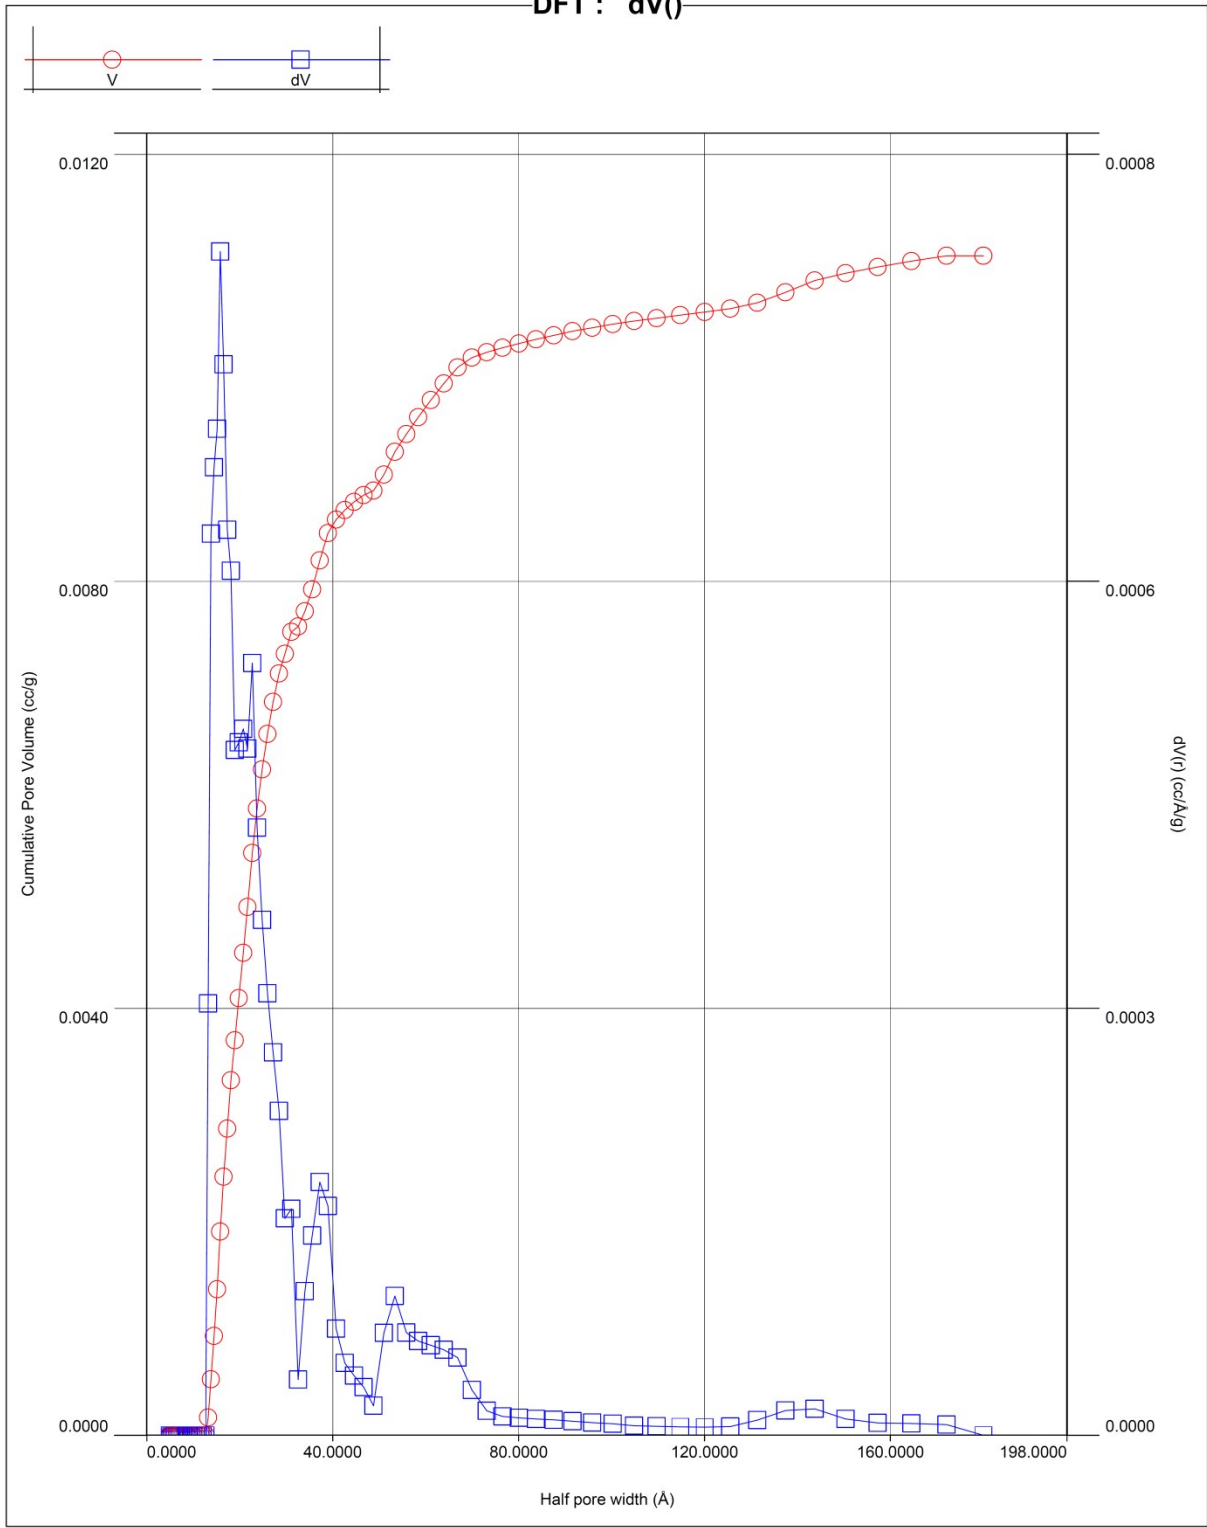

### DFT : Fitting Comparison

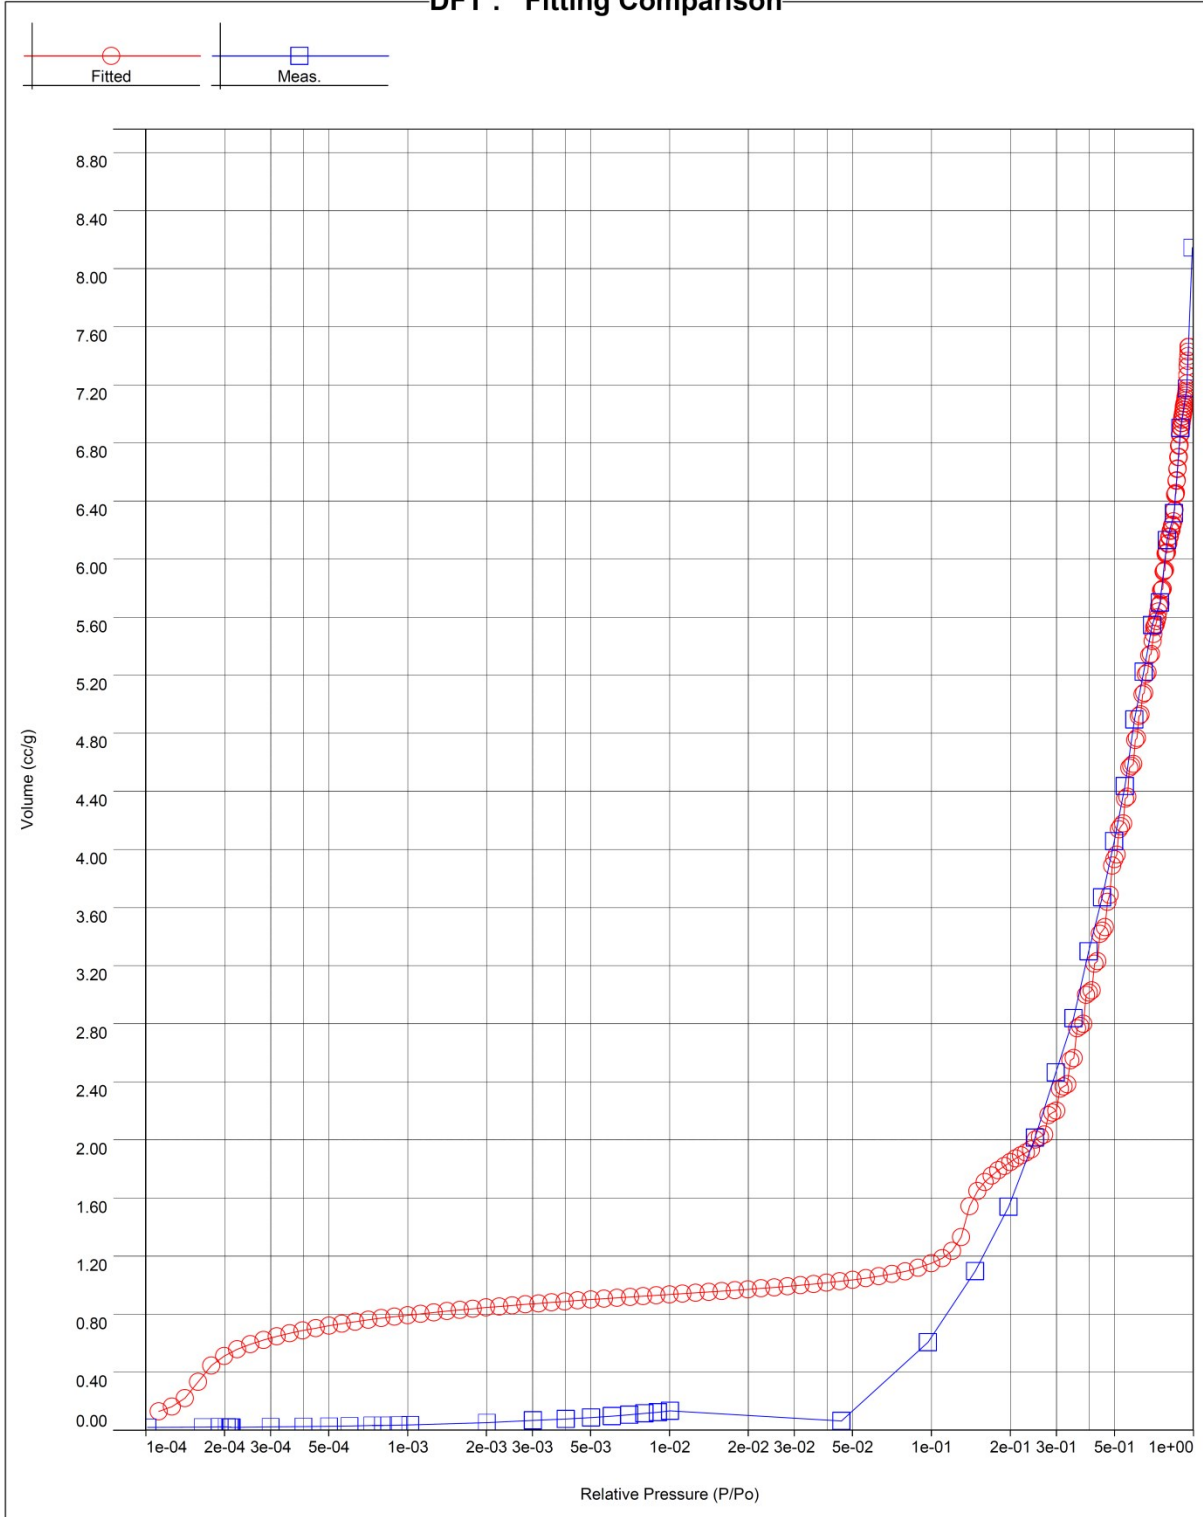

DFT : dS()

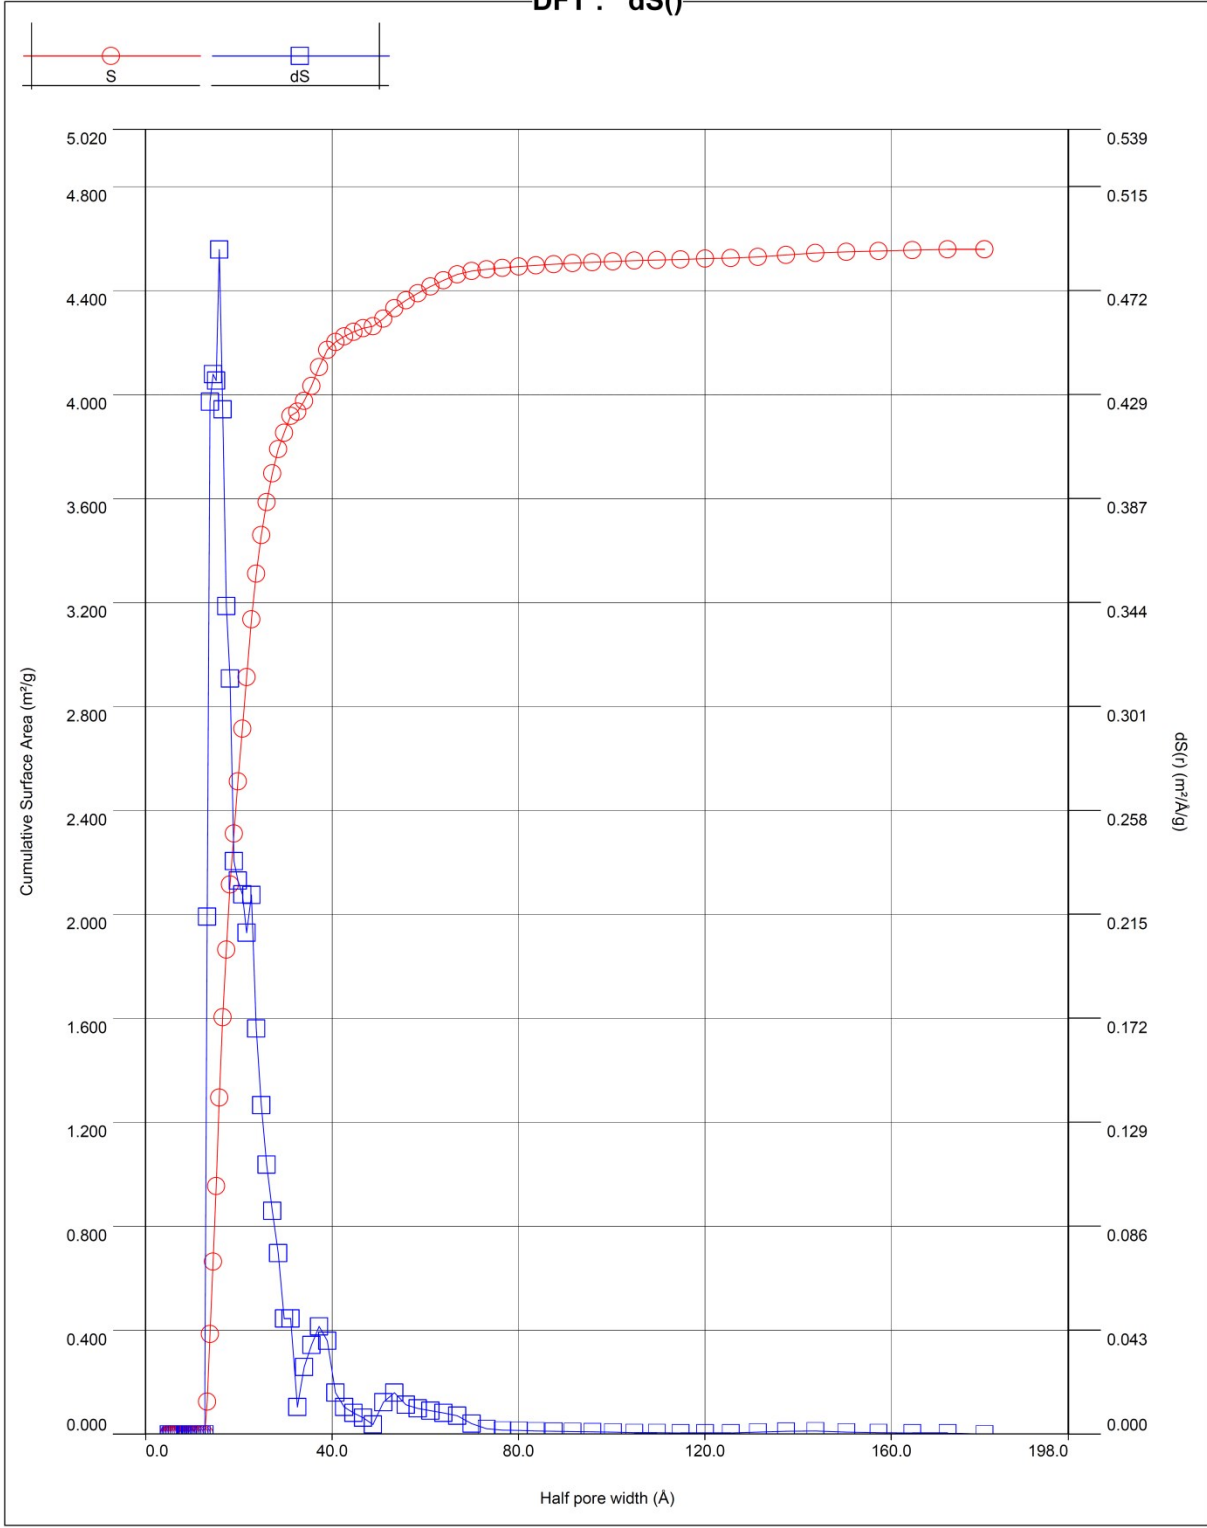

DFT : dS(log)

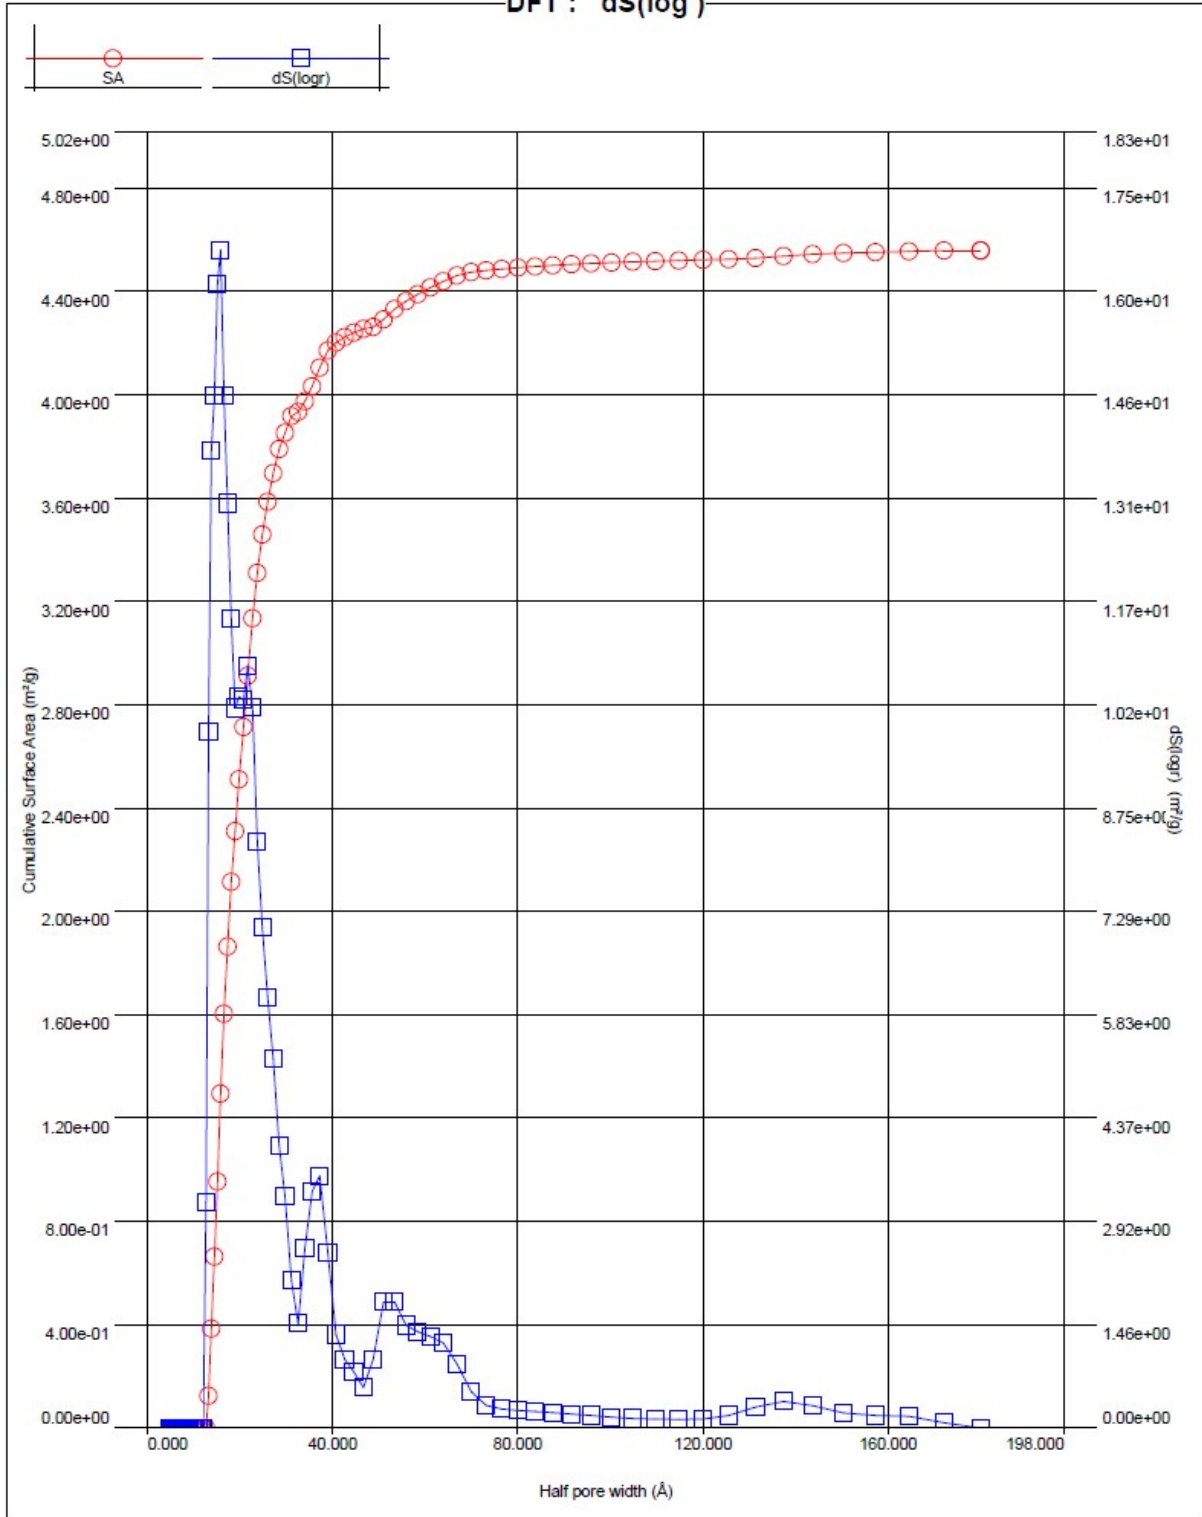



### Multi-Point BET

| Relative Pressure [P/Po] | Volume @ STP [cc/g] | 1 / [ W((Po/P) - 1) ] [1/g] | Relative Pressure [P/Po] | Volume @ STP [cc/g] | 1 / [ W((Po/P) - 1) ] [1/g] |
|--------------------------|---------------------|-----------------------------|--------------------------|---------------------|-----------------------------|
| 1.00529e-02              | 0.1321              | 6.1507e+01                  | 2.51416e-01              | 1.5687              | 1.7131e+02                  |
| 1.54432e-01              | 0.9619              | 1.5191e+02                  | 3.01487e-01              | 1.8150              | 1.9027e+02                  |
| 2.01540e-01              | 1.2624              | 1.5998e+02                  |                          |                     |                             |

### MBET summary

|                              |                         |
|------------------------------|-------------------------|
| Slope =                      | 435.370 1/g             |
| Intercept =                  | 6.698e+01 1/g           |
| Correlation coefficient, r = | 0.973157                |
| C constant =                 | 7.500                   |
| Surface Area =               | 6.932 m <sup>2</sup> /g |

### Total Pore Volume data

|                                                                                               |
|-----------------------------------------------------------------------------------------------|
| <b>Total Pore Volume</b>                                                                      |
| Total pore volume = 1.682e-02 cc/g for pores smaller than 2660.8 Å (Radius) at P/Po = 0.99639 |

### Average PoreSize data

|                       |               |
|-----------------------|---------------|
| Average pore Radius = | 4.85356e+01 Å |
|-----------------------|---------------|

### Single Point Surface Area

| Relative Pressure [P/Po] | Volume @ STP [cc/g] | 1 / [ W((P/Po) - 1) ] | Slope      | Surf. Area [m <sup>2</sup> /g] |
|--------------------------|---------------------|-----------------------|------------|--------------------------------|
| 3.01499e-03              | 0.0665              | 3.6394e+01            | 12071.1264 | 0.2885                         |
| 4.02271e-03              | 0.0774              | 4.1728e+01            | 10373.0756 | 0.3357                         |
| 5.02977e-03              | 0.0873              | 4.6344e+01            | 9214.0394  | 0.3780                         |
| 6.02829e-03              | 0.0958              | 5.0664e+01            | 8404.3486  | 0.4144                         |
| 7.02700e-03              | 0.1053              | 5.3760e+01            | 7650.5087  | 0.4552                         |
| 8.02484e-03              | 0.1151              | 5.6219e+01            | 7005.6147  | 0.4971                         |
| 9.03171e-03              | 0.1232              | 5.9168e+01            | 6551.1703  | 0.5316                         |
| 1.00529e-02              | 0.1321              | 6.1507e+01            | 6118.3167  | 0.5692                         |
| 1.54432e-01              | 0.9619              | 1.5191e+02            | 983.7030   | 3.5402                         |
| 2.01540e-01              | 1.2624              | 1.5998e+02            | 793.7939   | 4.3872                         |
| 2.51416e-01              | 1.5687              | 1.7131e+02            | 681.3636   | 5.1111                         |
| 3.01487e-01              | 1.8150              | 1.9027e+02            | 631.1063   | 5.5181                         |
| 3.51471e-01              | 2.1020              | 2.0629e+02            | 586.9313   | 5.9334                         |
| 4.01494e-01              | 2.3740              | 2.2609e+02            | 563.1194   | 6.1843                         |
| 4.51354e-01              | 2.6569              | 2.4774e+02            | 548.8922   | 6.3446                         |
| 5.01473e-01              | 2.9445              | 2.7334e+02            | 545.0750   | 6.3891                         |

### Thickness summary

|                              |          |
|------------------------------|----------|
| Thickness method: DeBoer     |          |
| Slope =                      | 0.800    |
| Intercept =                  | -2.206   |
| Correlation coefficient, r = | 0.999237 |

### V-t method summary

|                              |                         |
|------------------------------|-------------------------|
| Thickness method: DeBoer     |                         |
| Slope =                      | 0.800                   |
| Intercept =                  | -2.206                  |
| Correlation coefficient, r = | 0.999237                |
| Micropore volume =           | 0.000 cc/g              |
| Micropore area =             | 0.000 m <sup>2</sup> /g |
| External surface area =      | 6.932 m <sup>2</sup> /g |

Fig. S4. The BET plot and analysis data for calix-3 precursor.

Isotherm : Linear

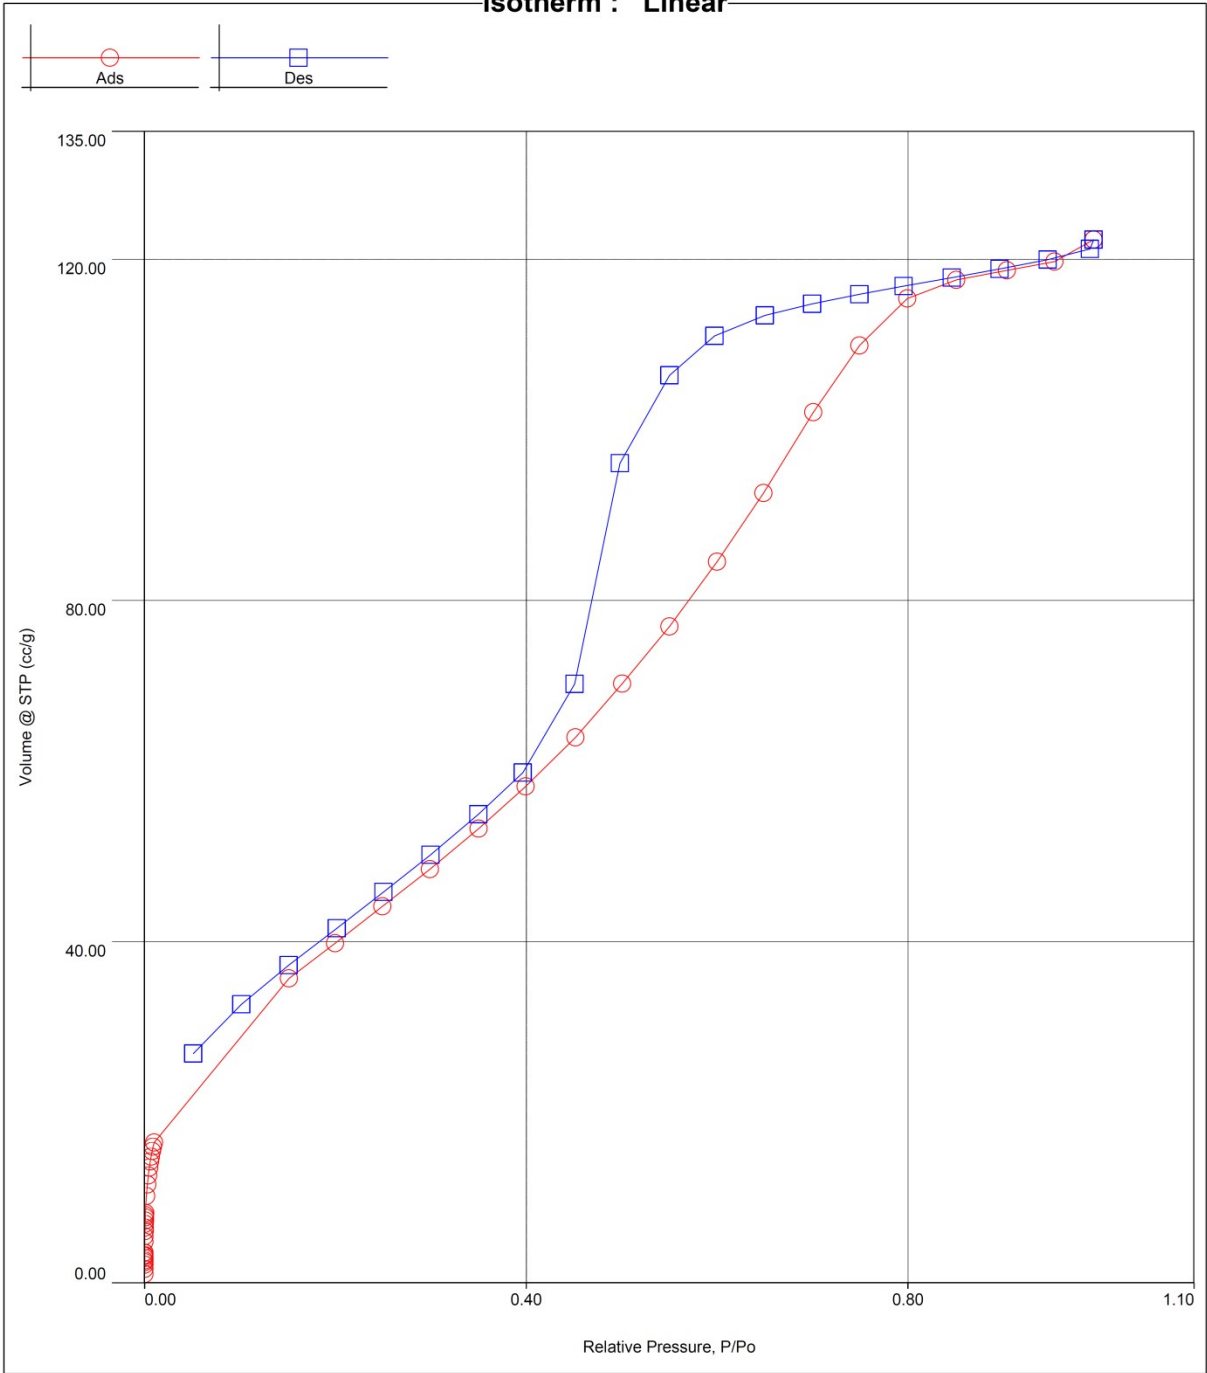

### Isotherm : Log Scale

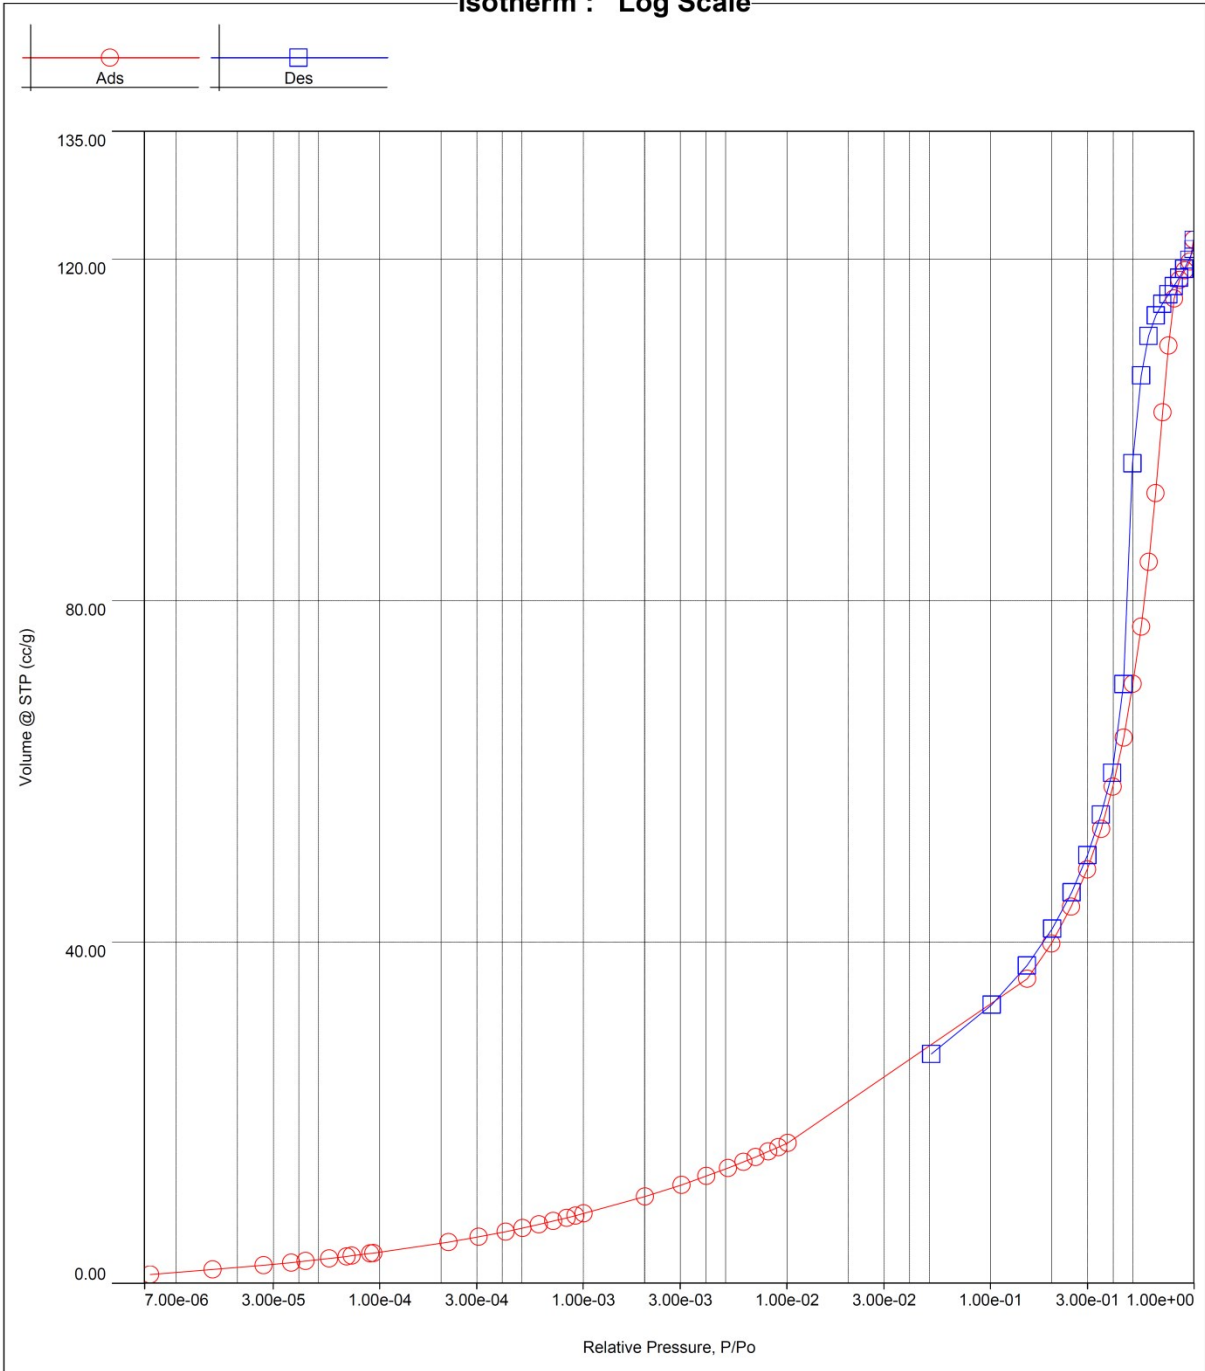

### Multi-Point BET Plot

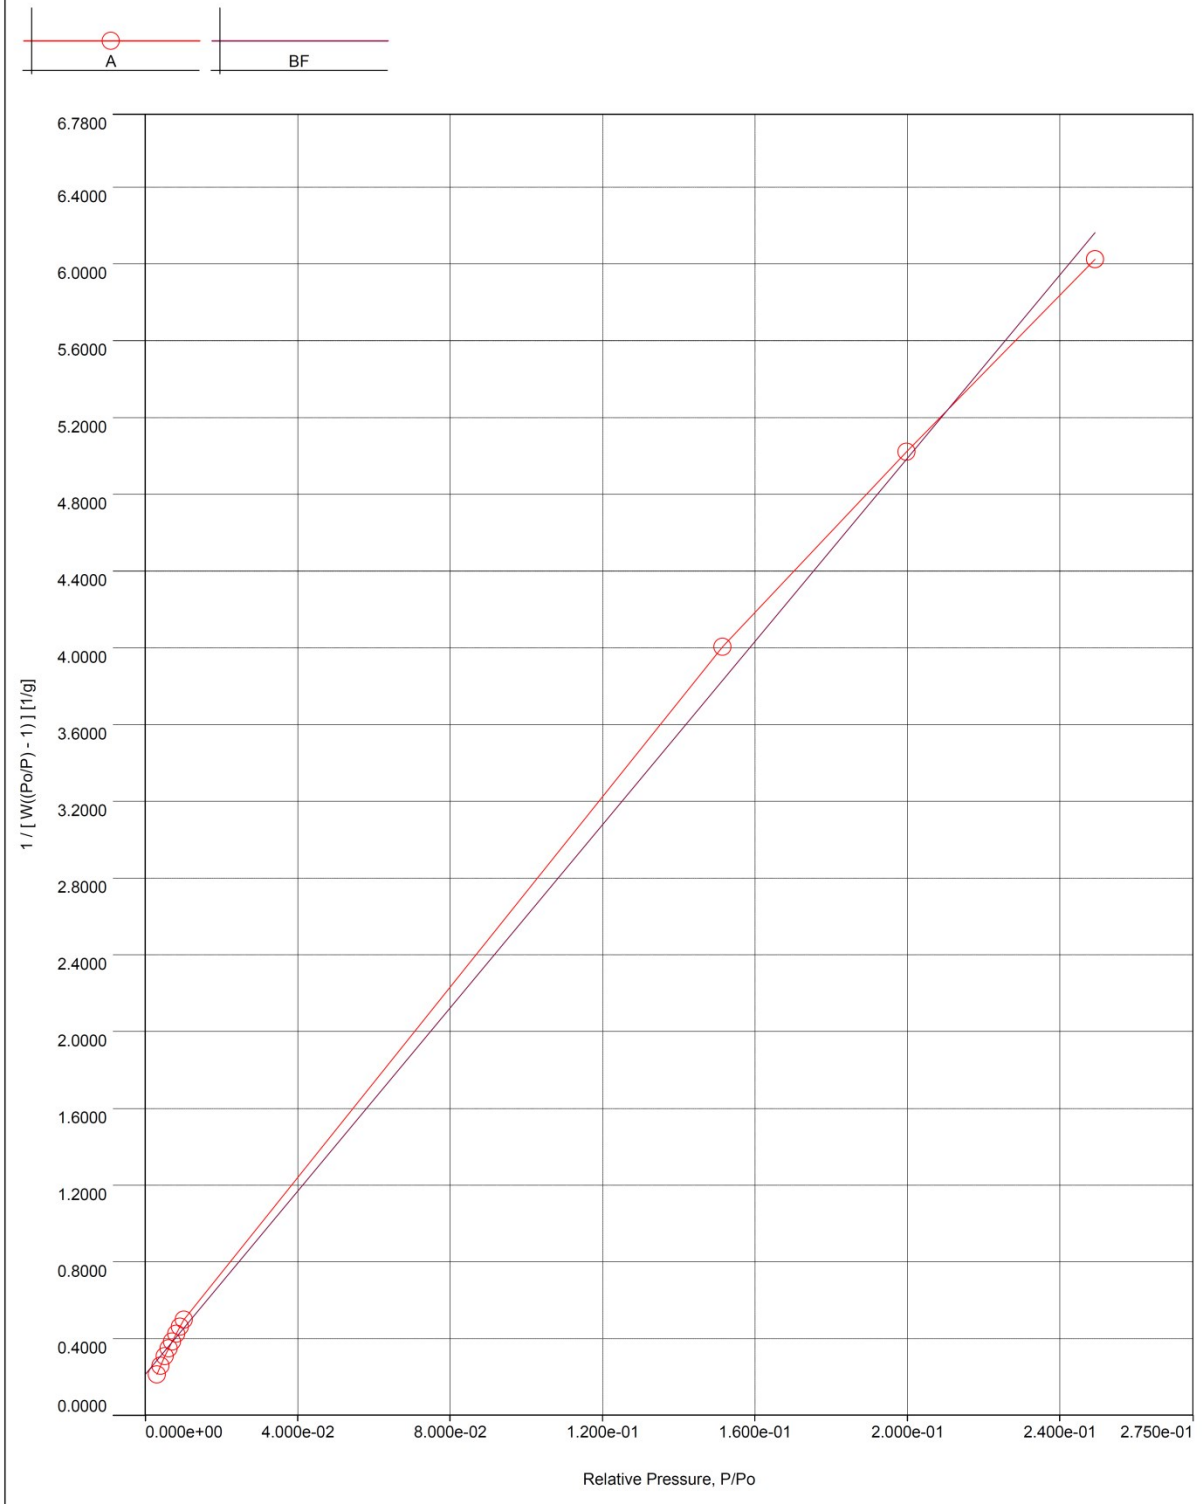

# t plot

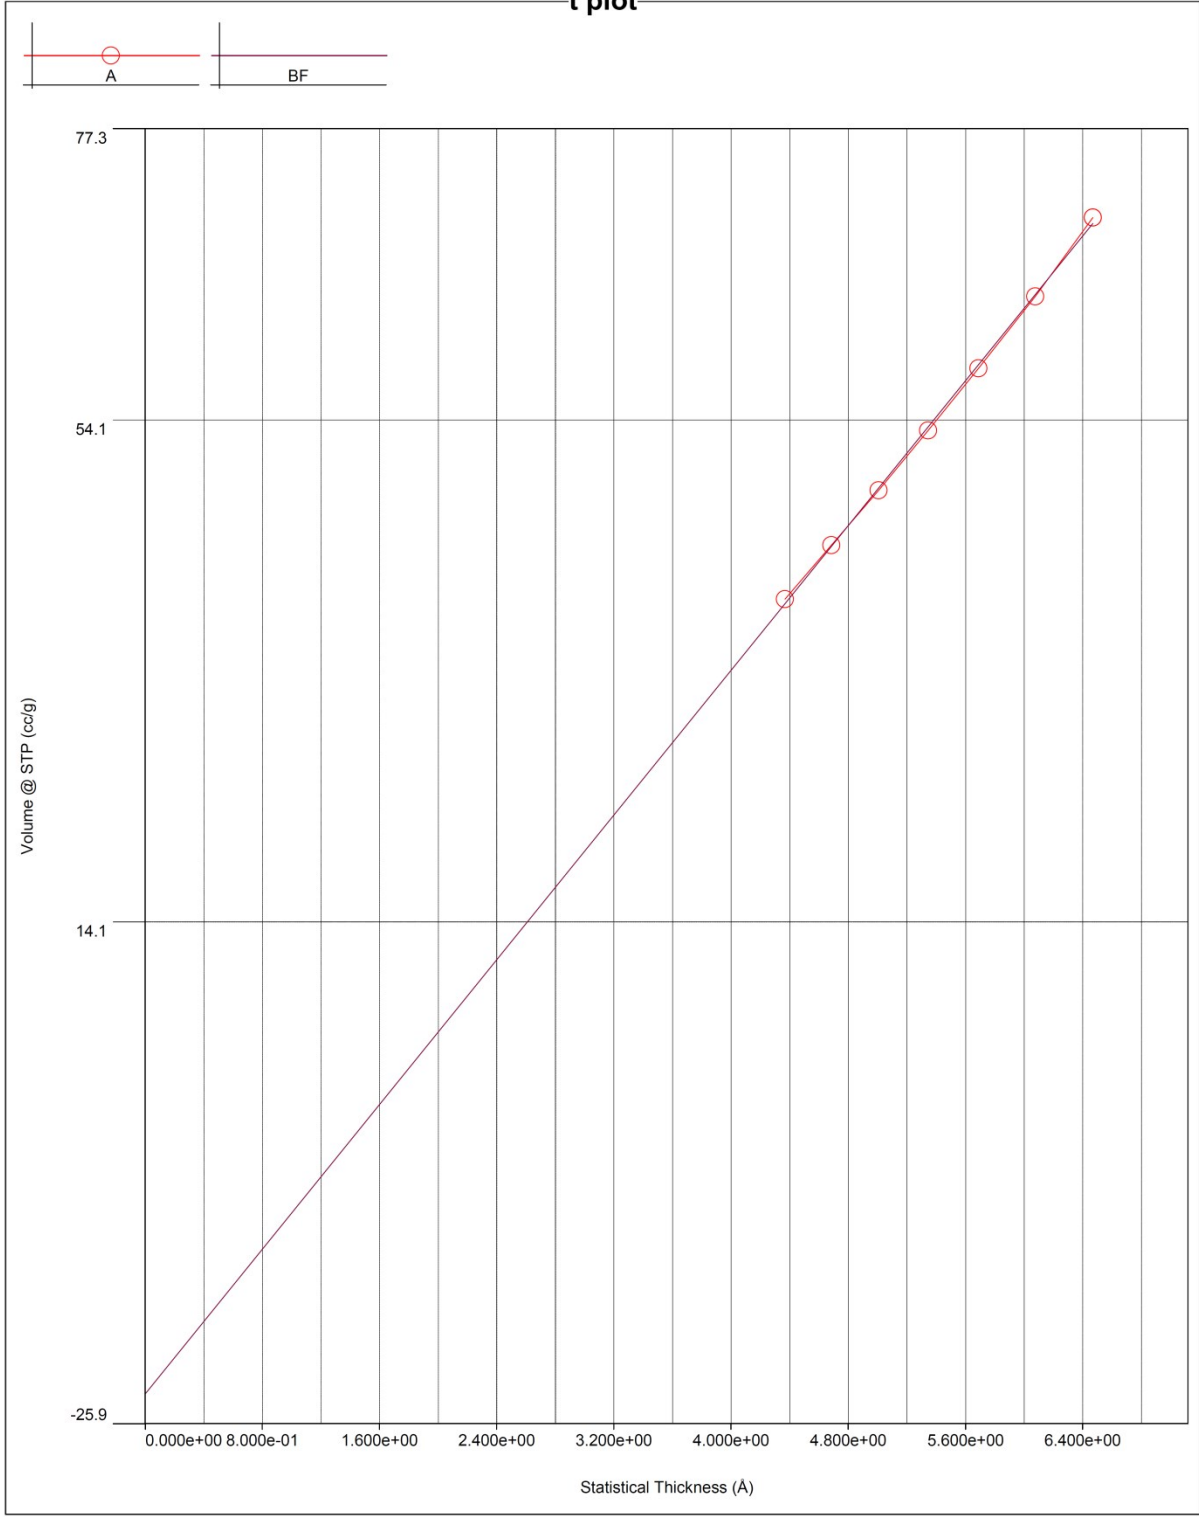

### BJH method Adsorption dV()

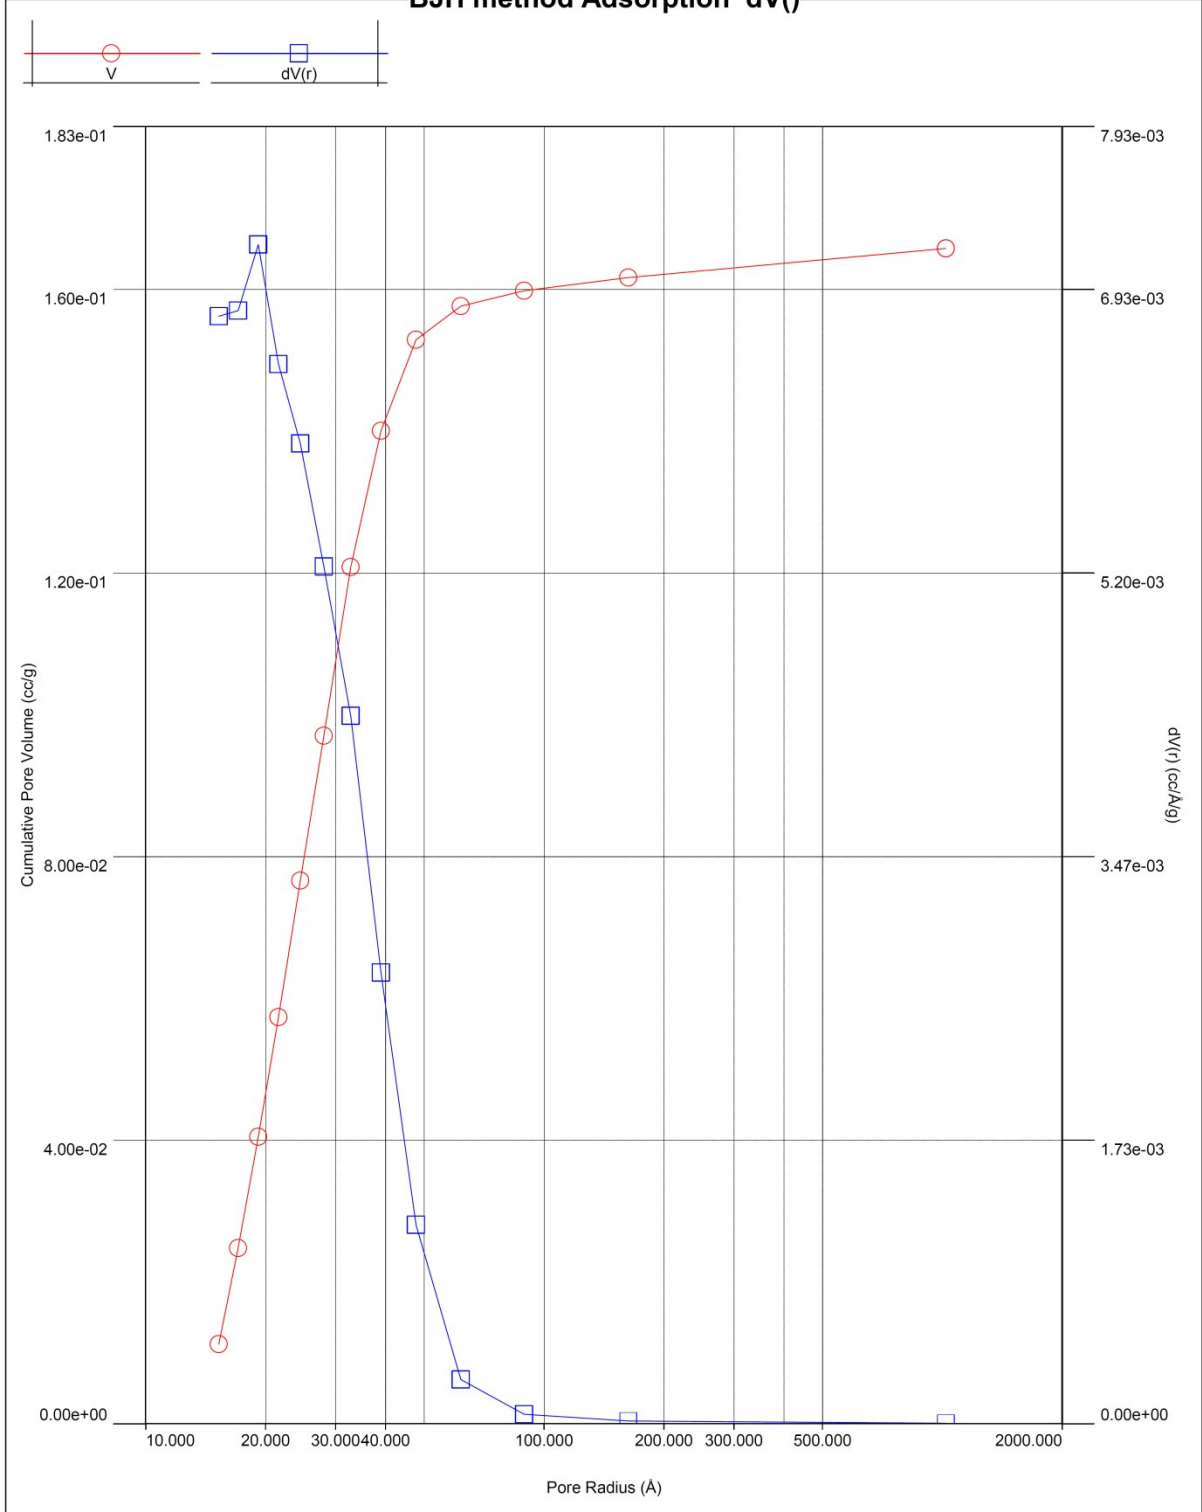

### BJH method Adsorption dV(log)

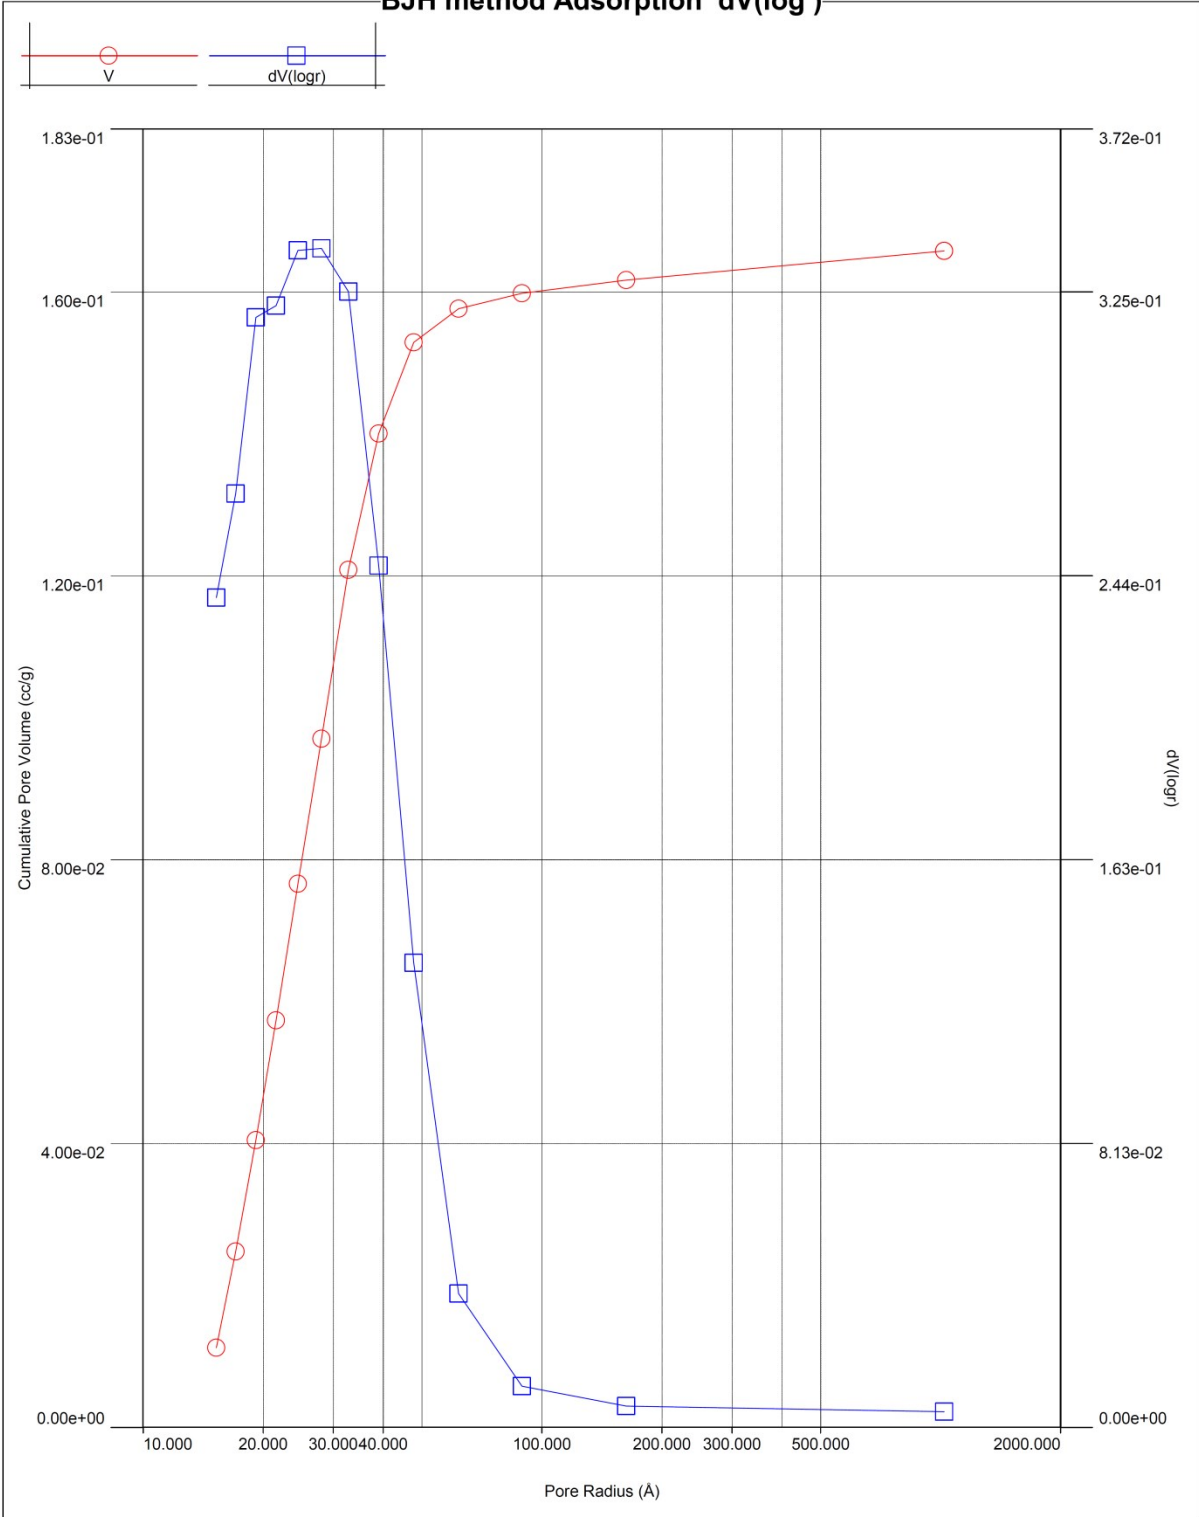



### BJH method Desorption dV()

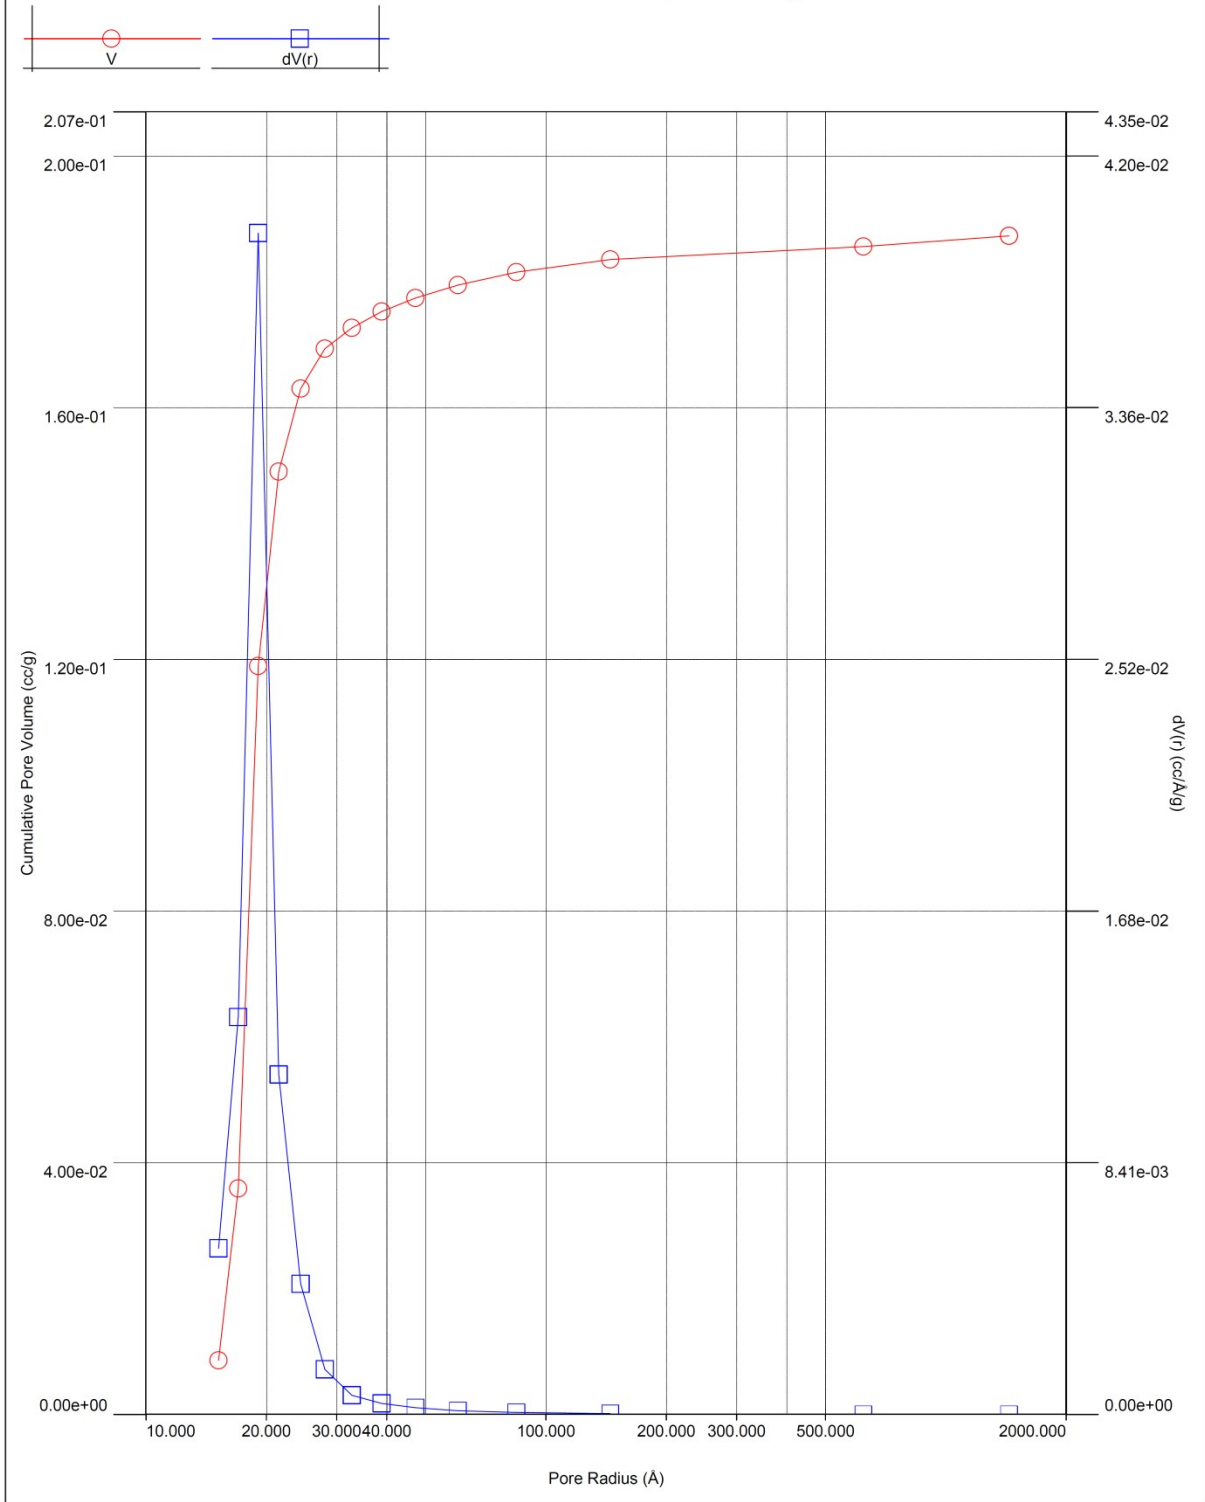

### BJH method Desorption dV(log)

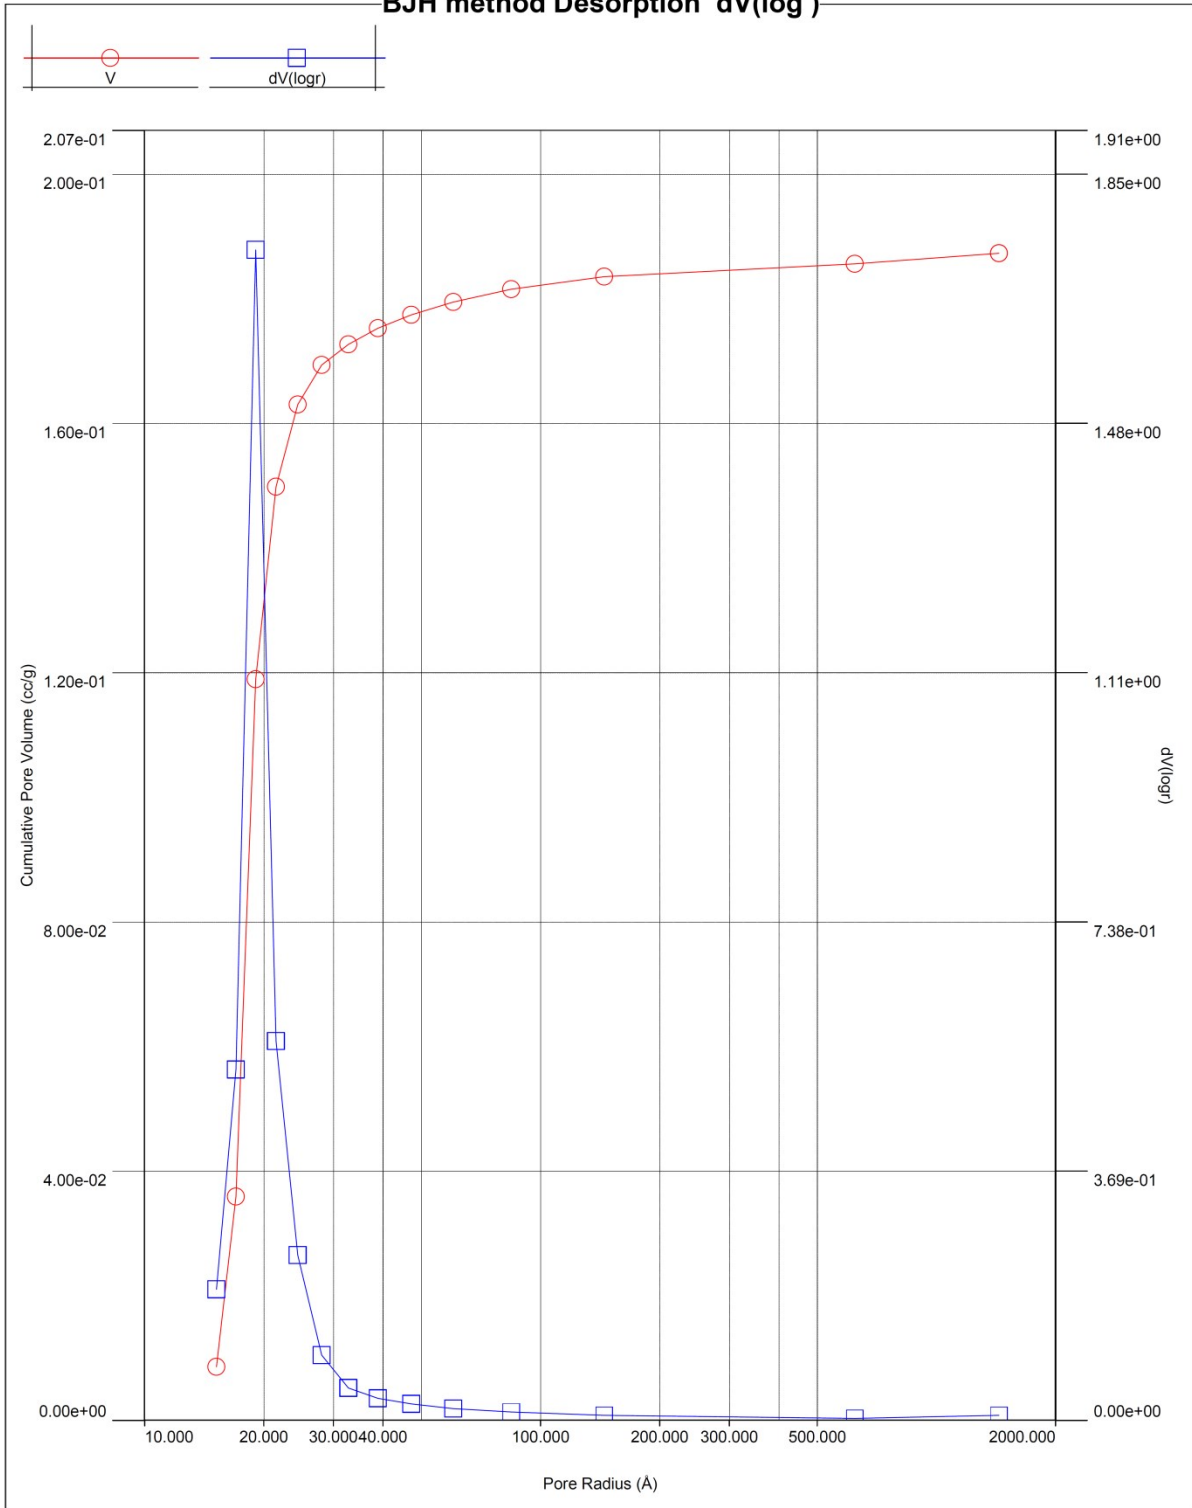

DFT : dV()

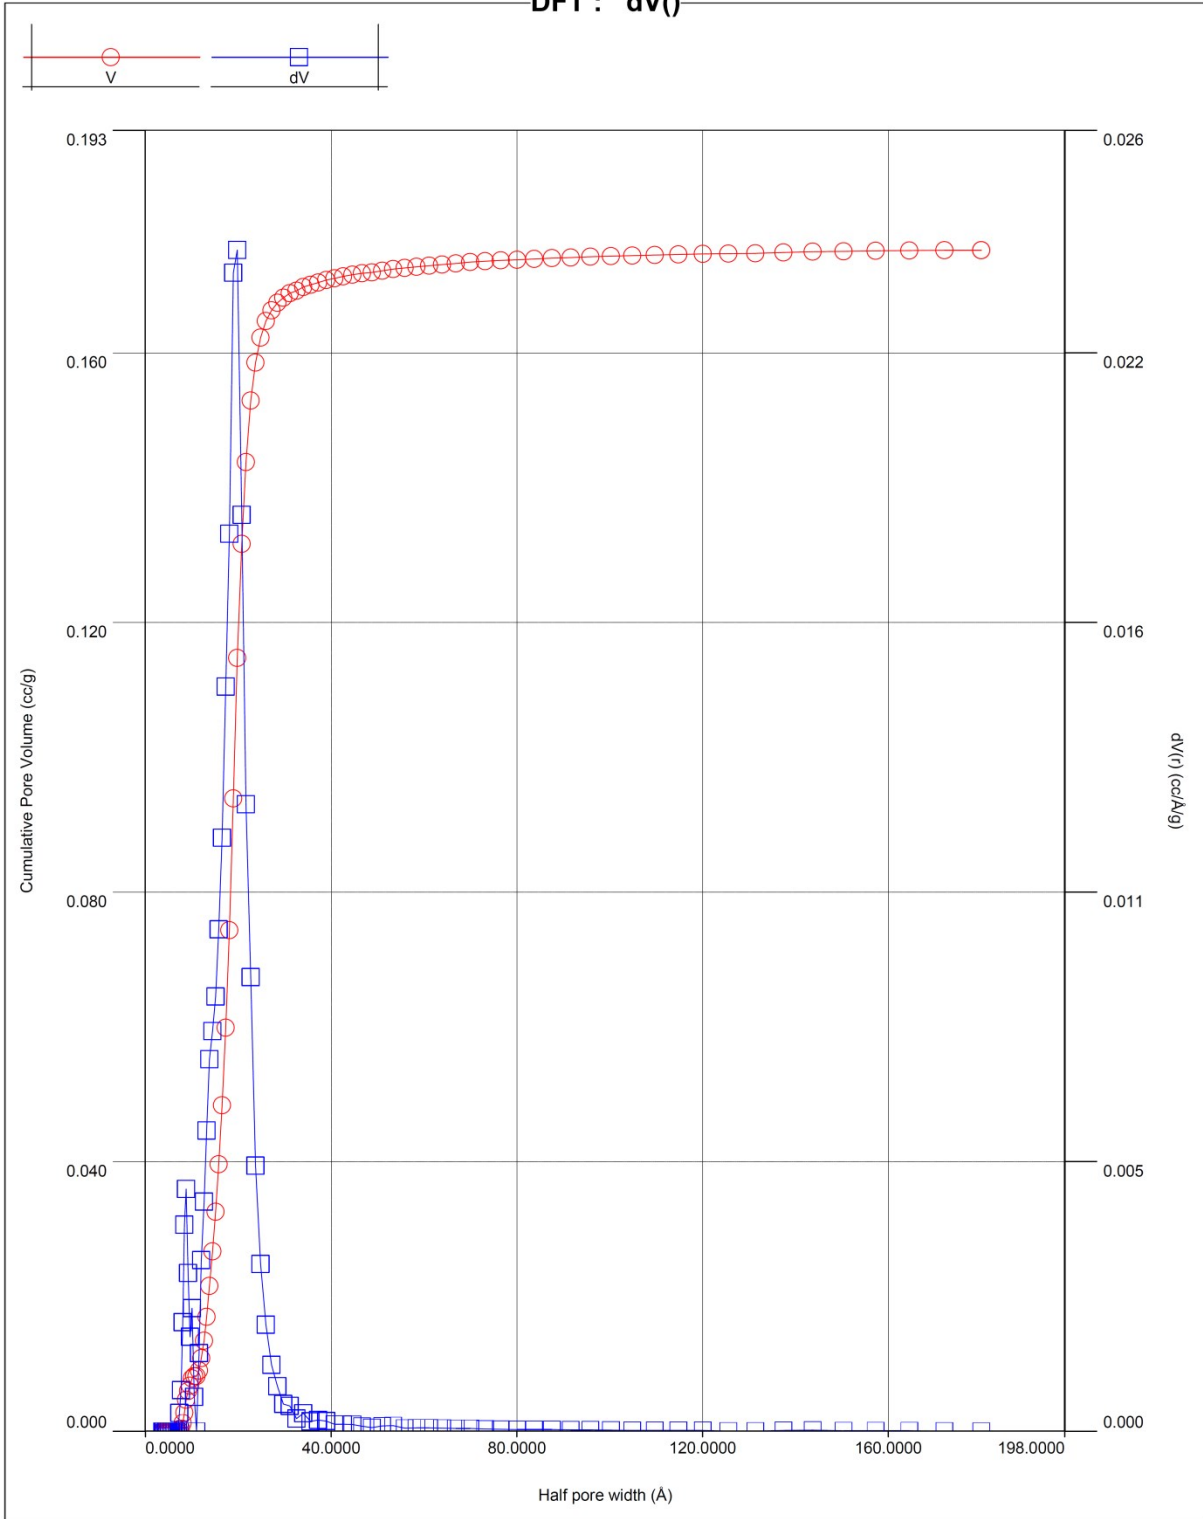

### DFT : Fitting Comparison

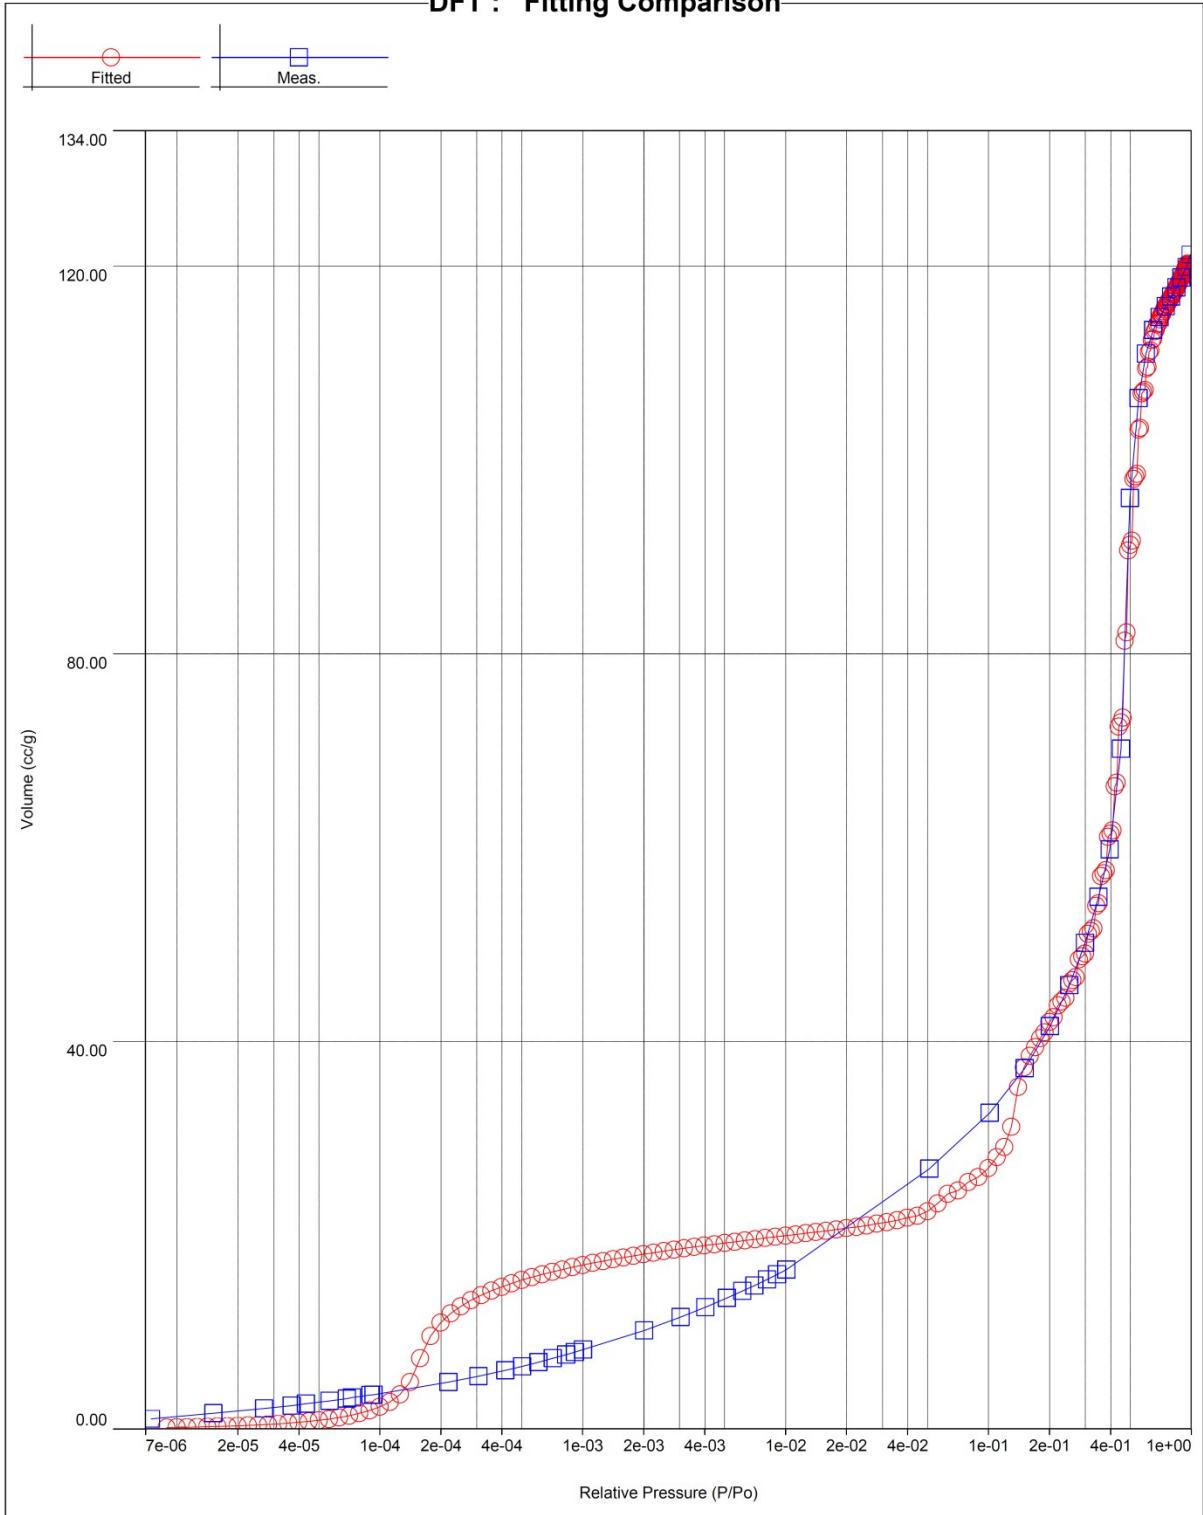

DFT : dS()

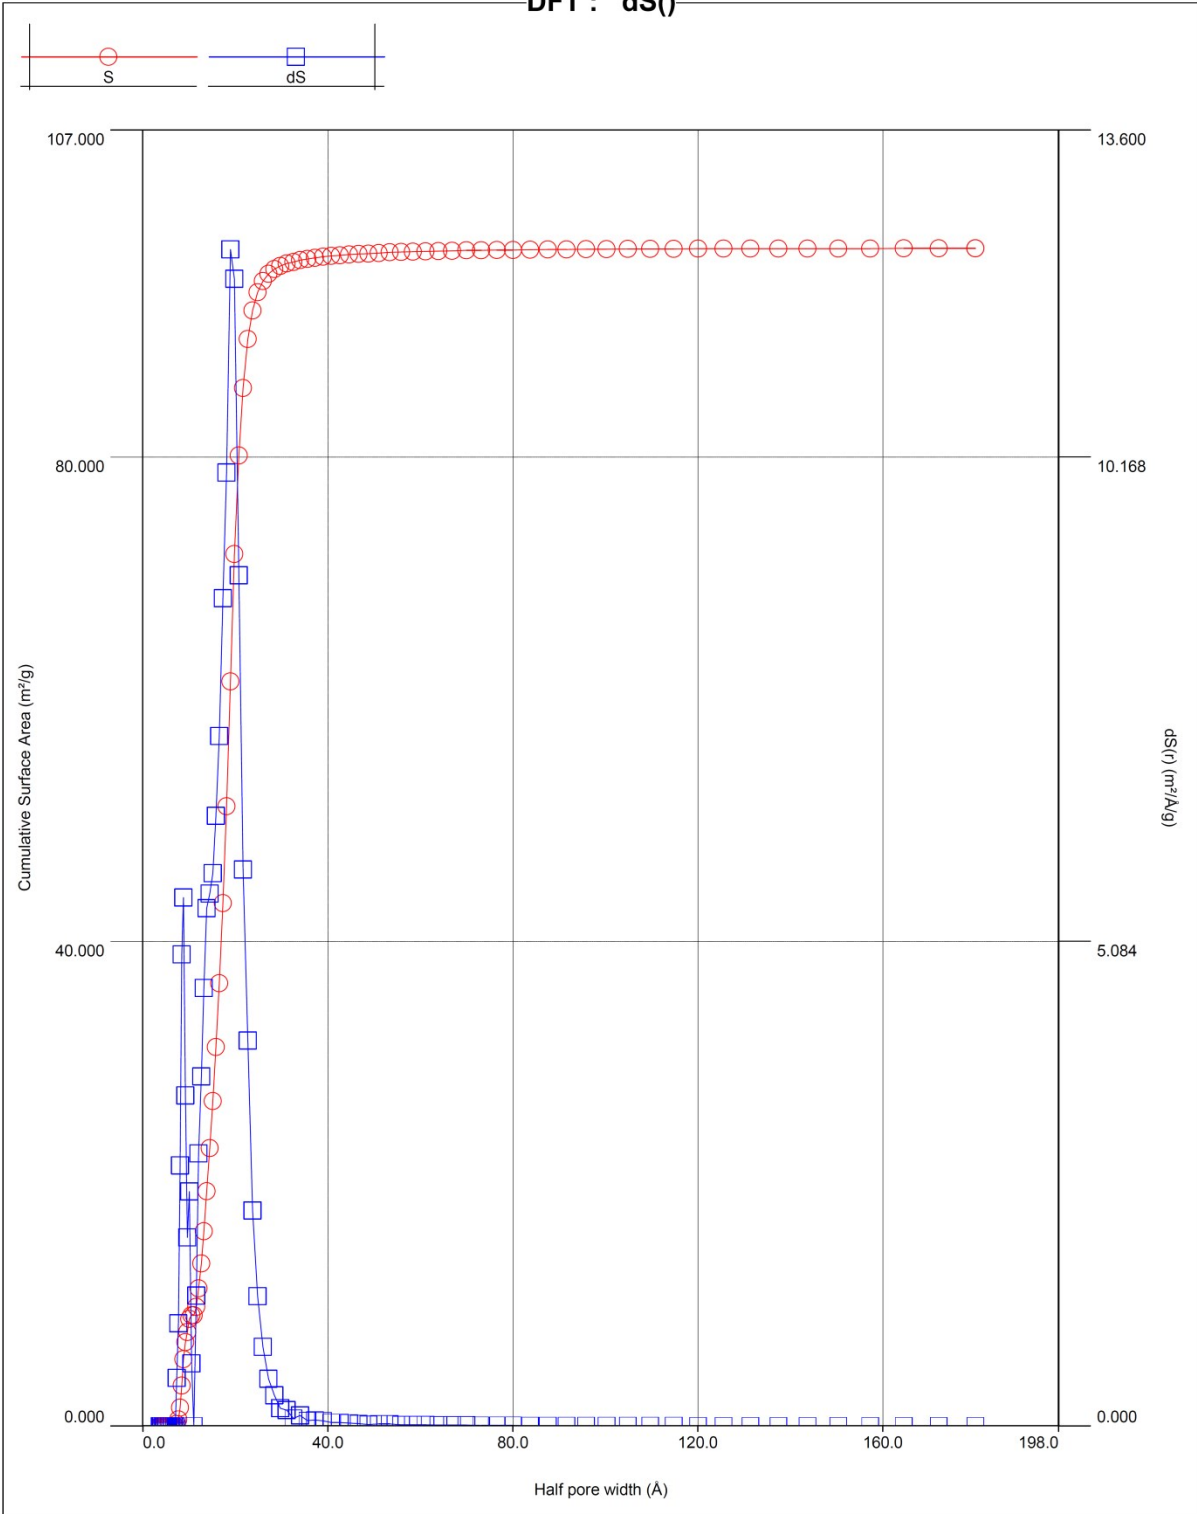

DFT : dS(logr)

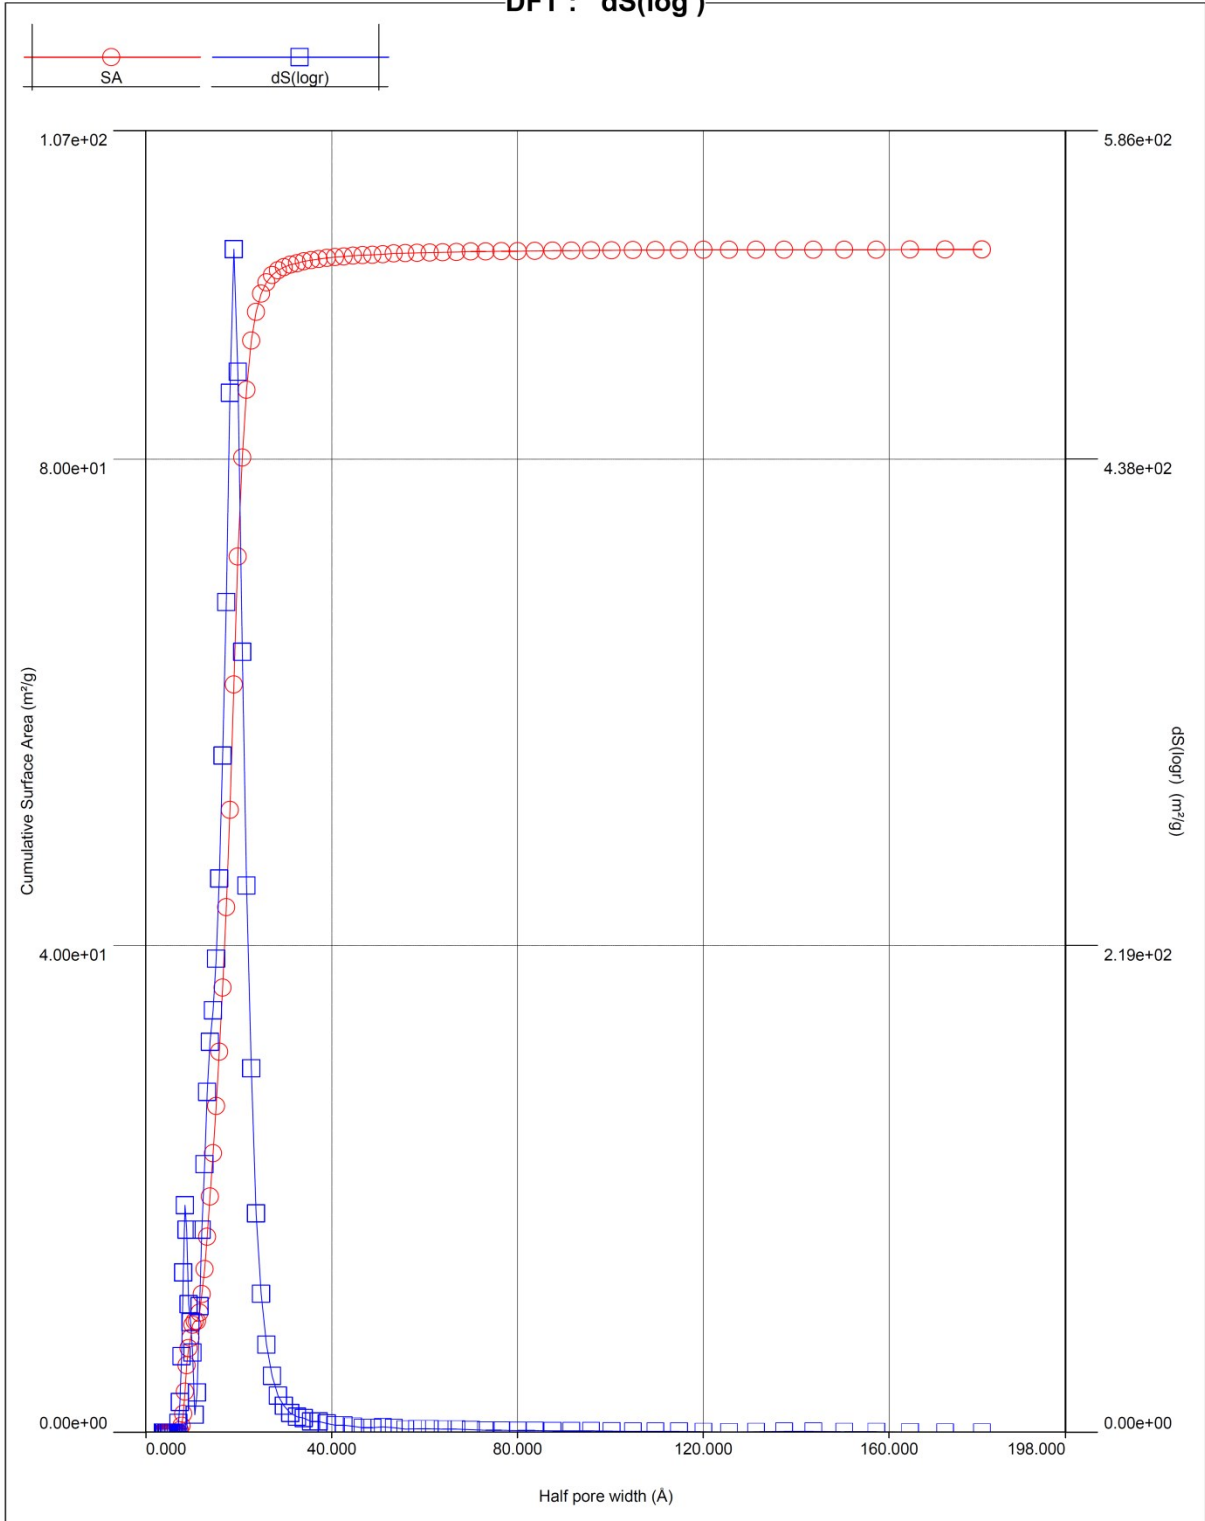

### Multi-Point BET

| Relative Pressure [P/Po] | Volume @ STP [cc/g] | 1 / [ W((Po/P) - 1) ] [1/g] | Relative Pressure [P/Po] | Volume @ STP [cc/g] | 1 / [ W((Po/P) - 1) ] [1/g] |
|--------------------------|---------------------|-----------------------------|--------------------------|---------------------|-----------------------------|
| 3.04515e-03              | 11.5254             | 2.1204e-01                  | 9.09683e-03              | 15.9404             | 4.6080e-01                  |
| 4.03642e-03              | 12.5579             | 2.5822e-01                  | 1.01236e-02              | 16.4313             | 4.9800e-01                  |
| 5.14660e-03              | 13.4983             | 3.0664e-01                  | 1.51489e-01              | 35.6733             | 4.0043e+00                  |
| 6.13671e-03              | 14.2184             | 3.4746e-01                  | 1.99807e-01              | 39.7915             | 5.0208e+00                  |
| 7.02144e-03              | 14.7876             | 3.8259e-01                  | 2.49312e-01              | 44.1070             | 6.0246e+00                  |
| 8.12461e-03              | 15.4301             | 4.2474e-01                  |                          |                     |                             |

### MBET summary

Slope = 23.865 1/g  
 Intercept = 2.135e-01 1/g  
 Correlation coefficient, r = 0.999354  
 C constant = 112.785  
 Surface Area = 144.633 m<sup>2</sup>/g

### Total Pore Volume data

#### Total Pore Volume

Total pore volume = 1.891e-01 cc/g for  
 pores smaller than 1825.8 Å (Radius)  
 at P/Po = 0.99473

### Average PoreSize data

Average pore Radius = 2.61543e+01 Å

### Single Point Surface Area

| Relative Pressure [P/Po] | Volume @ STP [cc/g] | 1 / [ W((P/Po) - 1) ] | Slope   | Surf. Area [m <sup>2</sup> /g] |
|--------------------------|---------------------|-----------------------|---------|--------------------------------|
| 3.04515e-03              | 11.5254             | 2.1204e-01            | 69.6337 | 50.0120                        |
| 4.03642e-03              | 12.5579             | 2.5822e-01            | 63.9722 | 54.4380                        |
| 5.14660e-03              | 13.4983             | 3.0664e-01            | 59.5814 | 58.4497                        |
| 6.13671e-03              | 14.2184             | 3.4746e-01            | 56.6205 | 61.5062                        |
| 7.02144e-03              | 14.7876             | 3.8259e-01            | 54.4895 | 63.9117                        |
| 8.12461e-03              | 15.4301             | 4.2474e-01            | 52.2787 | 66.6145                        |
| 9.09683e-03              | 15.9404             | 4.6080e-01            | 50.6546 | 68.7503                        |
| 1.01236e-02              | 16.4313             | 4.9800e-01            | 49.1923 | 70.7940                        |
| 1.51489e-01              | 35.6733             | 4.0043e+00            | 26.4332 | 131.7479                       |
| 1.99807e-01              | 39.7915             | 5.0208e+00            | 25.1285 | 138.5886                       |
| 2.49312e-01              | 44.1070             | 6.0246e+00            | 24.1648 | 144.1154                       |
| 2.99142e-01              | 48.4679             | 7.0460e+00            | 23.5541 | 147.8520                       |
| 3.50211e-01              | 53.2253             | 8.1020e+00            | 23.1345 | 150.5337                       |
| 3.99716e-01              | 58.1846             | 9.1567e+00            | 22.9079 | 152.0224                       |
| 4.51855e-01              | 63.9190             | 1.0319e+01            | 22.8362 | 152.4997                       |
| 5.00869e-01              | 70.2177             | 1.1434e+01            | 22.8291 | 152.5472                       |

### Thickness summary

Thickness method: DeBoer  
 Slope = 14.414  
 Intercept = -23.515  
 Correlation coefficient, r = 0.999575

### V-t method summary

Thickness method: DeBoer  
 Slope = 14.414  
 Intercept = -23.515  
 Correlation coefficient, r = 0.999575  
 Micropore volume = 0.000 cc/g  
 Micropore area = 0.000 m<sup>2</sup>/g  
 External surface area = 144.633 m<sup>2</sup>/g

Fig. S5. The BET plot and analysis data for CBOS precursor.



**Table S1.** ANOVA results of the quadratic surface model for the benzene adsorption process.

| Source                        | Sum of Squares | Degree of Freedom | Mean Square | F-value | p-value  |               |
|-------------------------------|----------------|-------------------|-------------|---------|----------|---------------|
| Model                         | 6.722E+05      | 9                 | 74688.59    | 81.89   | < 0.0001 | significant   |
| X <sub>1</sub> -Time          | 2.238E+05      | 1                 | 2.238E+05   | 245.42  | < 0.0001 |               |
| X <sub>2</sub> -Concentration | 1.627E+05      | 1                 | 1.627E+05   | 178.36  | < 0.0001 |               |
| X <sub>3</sub> -Temperature   | 55919.32       | 1                 | 55919.32    | 61.31   | < 0.0001 |               |
| X <sub>1</sub> X <sub>2</sub> | 10989.03       | 1                 | 10989.03    | 12.05   | 0.0060   |               |
| X <sub>1</sub> X <sub>3</sub> | 5371.66        | 1                 | 5371.66     | 5.89    | 0.0356   |               |
| X <sub>2</sub> X <sub>3</sub> | 127.20         | 1                 | 127.20      | 0.1395  | 0.7166   |               |
| X <sub>1</sub> <sup>2</sup>   | 1.062E+05      | 1                 | 1.062E+05   | 116.46  | < 0.0001 |               |
| X <sub>2</sub> <sup>2</sup>   | 1.098E+05      | 1                 | 1.098E+05   | 120.37  | < 0.0001 |               |
| X <sub>3</sub> <sup>2</sup>   | 35291.14       | 1                 | 35291.14    | 38.70   | < 0.0001 |               |
| Residual                      | 9120.21        | 10                | 912.02      | -       | -        |               |
| Lack of Fit                   | 122.79         | 5                 | 122.79      | 0.1269  | 0.8215   | insignificant |
| Pure Error                    | 6.25           | 5                 | 1.25        | -       | -        |               |
| Cor Total                     | 6.813E+05      | 19                | -           | -       | -        |               |

R<sup>2</sup> = 0.9866, Adjusted R<sup>2</sup> = 0.9746, Predicted R<sup>2</sup> = 0.8994, Adequate Precision = 28.2665

**Table S2.** ANOVA results of the quadratic surface model for the toluene adsorption process.

| Source                        | Sum of Squares | Degree of Freedom | Mean Square | F-value   | p-value  |               |
|-------------------------------|----------------|-------------------|-------------|-----------|----------|---------------|
| Model                         | 8.065E+05      | 9                 | 89606.56    | 72.92     | < 0.0001 | significant   |
| X <sub>1</sub> -Time          | 2.661E+05      | 1                 | 2.661E+05   | 216.53    | < 0.0001 |               |
| X <sub>2</sub> -Concentration | 2.082E+05      | 1                 | 2.082E+05   | 169.43    | < 0.0001 |               |
| X <sub>3</sub> -Temperature   | 60054.58       | 1                 | 60054.58    | 48.87     | < 0.0001 |               |
| X <sub>1</sub> X <sub>2</sub> | 14377.84       | 1                 | 14377.84    | 11.70     | 0.0065   |               |
| X <sub>1</sub> X <sub>3</sub> | 6191.06        | 1                 | 6191.06     | 5.04      | 0.0486   |               |
| X <sub>2</sub> X <sub>3</sub> | 0.0003         | 1                 | 0.0003      | 2.543E-07 | 0.9996   |               |
| X <sub>1</sub> <sup>2</sup>   | 1.339E+05      | 1                 | 1.339E+05   | 108.98    | < 0.0001 |               |
| X <sub>2</sub> <sup>2</sup>   | 1.264E+05      | 1                 | 1.264E+05   | 102.83    | < 0.0001 |               |
| X <sub>3</sub> <sup>2</sup>   | 34457.52       | 1                 | 34457.52    | 28.04     | 0.0003   |               |
| Residual                      | 12288.28       | 10                | 1228.83     | -         | -        |               |
| Lack of Fit                   | 117.58         | 5                 | 117.58      | 0.1023    | 0.9510   | insignificant |
| Pure Error                    | 1.05           | 5                 | 0.2097      | -         | -        |               |
| Cor Total                     | 8.187E+05      | 19                | -           | -         | -        |               |

R<sup>2</sup> = 0.9850, Adjusted R<sup>2</sup> = 0.9715, Predicted R<sup>2</sup> = 0.8854, Adequate Precision = 26.9512
